# Supplementary material for: Heterogenisation of ketonecatalysts within mesoporous supports for asymmetric epoxidation
Source: Royal Society of Chemistry journal article supplement (doi:10.1039/c2ra21837b), 2012-11-29

# Heterogenisation of ketone catalysts within mesoporous supports for asymmetric epoxidation

**Lynda J. Brown\*, Richard C. D. Brown and Robert Raja**

*School of Chemistry, University of Southampton,  
Highfield, Southampton,  
SO17 1BJ, UK.*

Phone: (+)44-(0)23-8059-6757

Fax: (+)44-(0)23-8059-3781

E-mail: [ljb2@soton.ac.uk](mailto:ljb2@soton.ac.uk)

**Supporting Information**

## Table of Contents

|                                                                                    |            |
|------------------------------------------------------------------------------------|------------|
| <b>NMR spectroscopic data (catalyst synthesis)</b>                                 | <b>S4</b>  |
| <sup>1</sup> H NMR Compound <b>2</b>                                               | <b>S4</b>  |
| <sup>13</sup> C NMR Compound <b>2</b>                                              | <b>S5</b>  |
| <sup>1</sup> H NMR Compound <b>3</b>                                               | <b>S6</b>  |
| <sup>13</sup> C NMR Compound <b>3</b>                                              | <b>S7</b>  |
| <sup>1</sup> H NMR Compound <b>4</b>                                               | <b>S8</b>  |
| <sup>13</sup> C NMR Compound <b>4</b>                                              | <b>S9</b>  |
| <sup>1</sup> H NMR Compound <b>5</b>                                               | <b>S10</b> |
| <sup>13</sup> C NMR Compound <b>5</b>                                              | <b>S11</b> |
| <sup>1</sup> H NMR Compound <b>7</b>                                               | <b>S12</b> |
| <sup>13</sup> C NMR Compound <b>7</b>                                              | <b>S13</b> |
| <sup>29</sup> Si NMR Sílica <b>8a</b>                                              | <b>S14</b> |
| <sup>29</sup> Si NMR Sílica <b>9a</b>                                              | <b>S15</b> |
| <sup>13</sup> C NMR Sílica <b>9a</b>                                               | <b>S16</b> |
| <sup>29</sup> Si NMR Sílica <b>10a</b>                                             | <b>S17</b> |
| <sup>13</sup> C NMR Sílica <b>10a</b>                                              | <b>S18</b> |
| <br>                                                                               |            |
| <b><sup>1</sup>H NMR spectroscopic data (epoxides)</b>                             | <b>S19</b> |
| <br>                                                                               |            |
| <sup>1</sup> H NMR (1 <i>S</i> ,2 <i>R</i> )-1,2-Dihydronaphthalene oxide          | <b>S19</b> |
| <sup>1</sup> H NMR ( <i>R,R</i> )- <i>trans</i> -Stilbene oxide                    | <b>S20</b> |
| <sup>1</sup> H NMR (3 <i>R</i> ,4 <i>R</i> )-2,2-Dimethy-6-cyano-chromene oxide    | <b>S21</b> |
| <sup>1</sup> H NMR (3 <i>R</i> ,4 <i>R</i> )-2,2-Dimethylchromene oxide            | <b>S22</b> |
| <sup>1</sup> H NMR (3 <i>R</i> ,4 <i>R</i> )-2,2-Dimethy-6-chloro-chromene oxide   | <b>S23</b> |
| <sup>1</sup> H NMR (3 <i>R</i> ,4 <i>R</i> )-2,2-Dimethy-6-bromo-chromene oxide    | <b>S24</b> |
| <sup>1</sup> H NMR (3 <i>R</i> ,4 <i>R</i> )-2,2-Dimethy-6-fluoro-chromene oxide   | <b>S25</b> |
| <sup>1</sup> H NMR (1 <i>R</i> ,2 <i>S</i> )-Indene oxide                          | <b>S26</b> |
| <sup>1</sup> H NMR 1-Phenylcyclohexene oxide                                       | <b>S27</b> |
| <br>                                                                               |            |
| <b>Chiral HPLC chromatograms for epoxides</b>                                      | <b>S28</b> |
| <br>                                                                               |            |
| HPLC chromatogram of (1 <i>S</i> ,2 <i>R</i> )-1,2-Dihydronaphthalene oxide        | <b>S28</b> |
| HPLC chromatogram of ( <i>R,R</i> )- <i>trans</i> -Stilbene oxide                  | <b>S28</b> |
| HPLC chromatogram of (3 <i>R</i> ,4 <i>R</i> )-2,2-Dimethy-6-cyano-chromene oxide  | <b>S28</b> |
| HPLC chromatogram of (3 <i>R</i> ,4 <i>R</i> )-2,2-Dimethylchromene oxide          | <b>S29</b> |
| HPLC chromatogram of (3 <i>R</i> ,4 <i>R</i> )-2,2-Dimethy-6-chloro-chromene oxide | <b>S29</b> |

|                                                                                    |            |
|------------------------------------------------------------------------------------|------------|
| HPLC chromatogram of (3 <i>R</i> ,4 <i>R</i> )-2,2-Dimethy-6-bromo-chromene oxide  | <b>S29</b> |
| HPLC chromatogram of (3 <i>R</i> ,4 <i>R</i> )-2,2-Dimethy-6-fluoro-chromene oxide | <b>S30</b> |
| HPLC chromatogram of(1 <i>R</i> ,2 <i>S</i> )- Indene oxide                        | <b>S30</b> |
| HPLC chromatogram of 1-Phenylcyclohexene oxide                                     | <b>S30</b> |

### **NMR spectroscopic data (catalyst synthesis)**

<sup>1</sup>H NMR for (2*R*,3*S*,4*R*,5*R*)-2-(((4-(But-3-en-1-yl)phenyl)amino)methyl) tetrahydro-2*H*-pyran-2,3,4,5-tetraol (**2**)

[300 MHz, DMSO]

MA1909LJIB3.010.001.1R.ESP

6.91  
6.88  
6.56  
6.53  
5.86  
5.84  
5.82  
5.80  
5.79  
5.78  
5.77  
5.75  
5.47  
5.04  
4.98  
4.95  
4.92  
4.43  
4.41  
4.39  
4.37  
3.86  
3.82  
3.65  
3.60  
3.57  
3.55  
3.49  
3.45  
3.33  
3.27  
3.26  
3.01  
3.00  
2.97  
2.52  
2.50  
2.47  
2.27  
2.25  
2.23

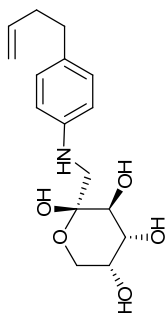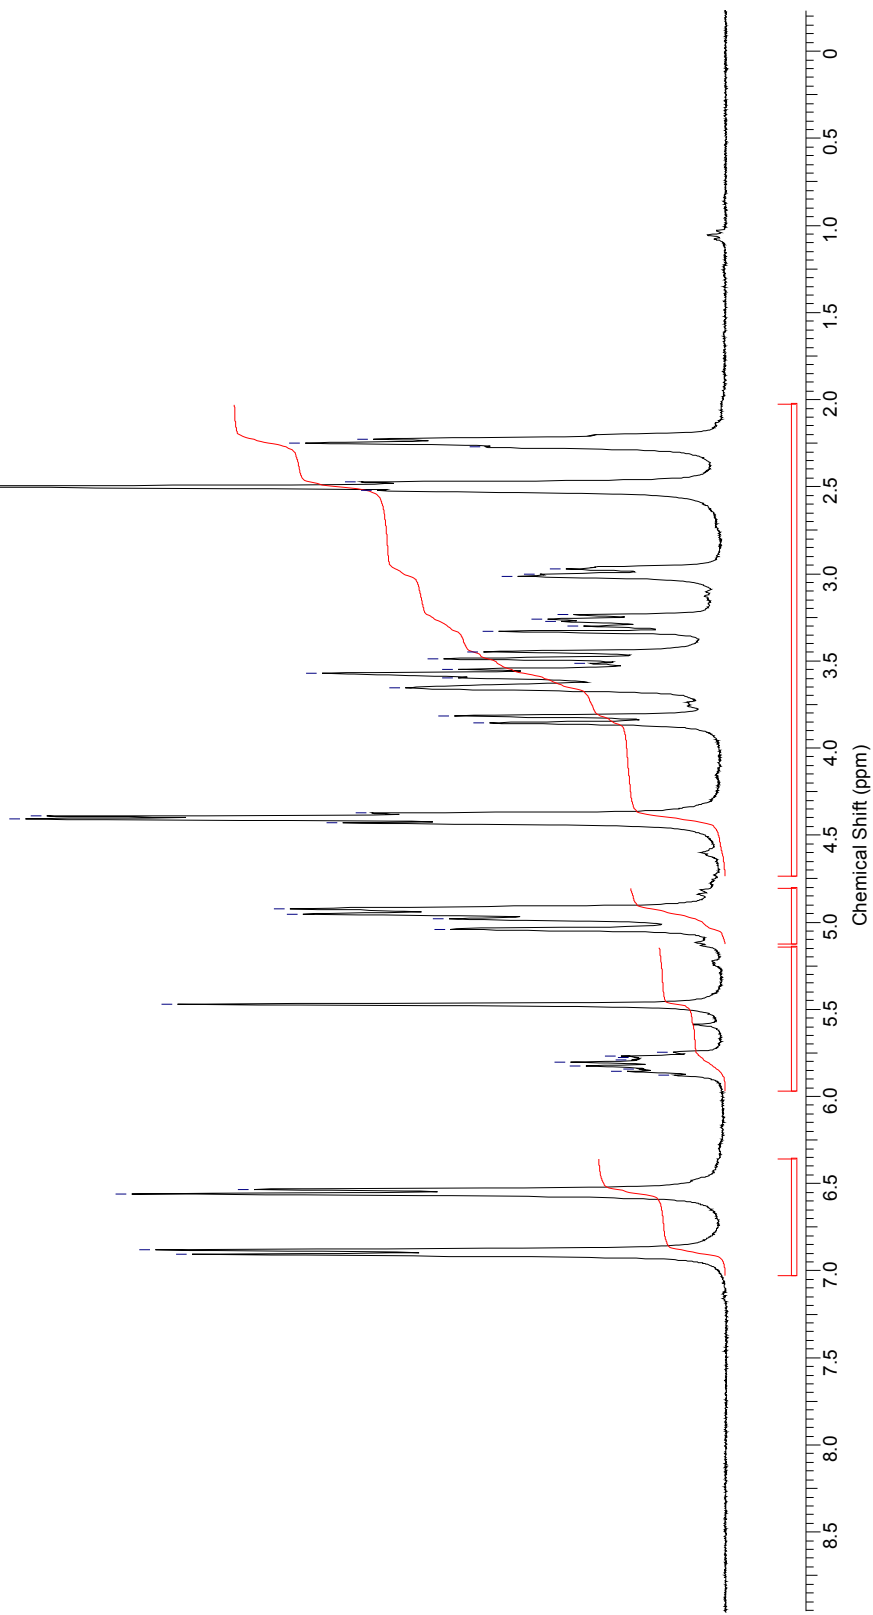

$^{13}\text{C}$  NMR for (2*R*,3*S*,4*R*,5*R*)-2-(((4-(*But-3-en-1-yl*)phenyl)amino)methyl) tetrahydro-2*H*-pyran-2,3,4,5-tetraol (**2**).

[75 MHz, DMSO]

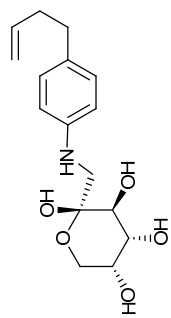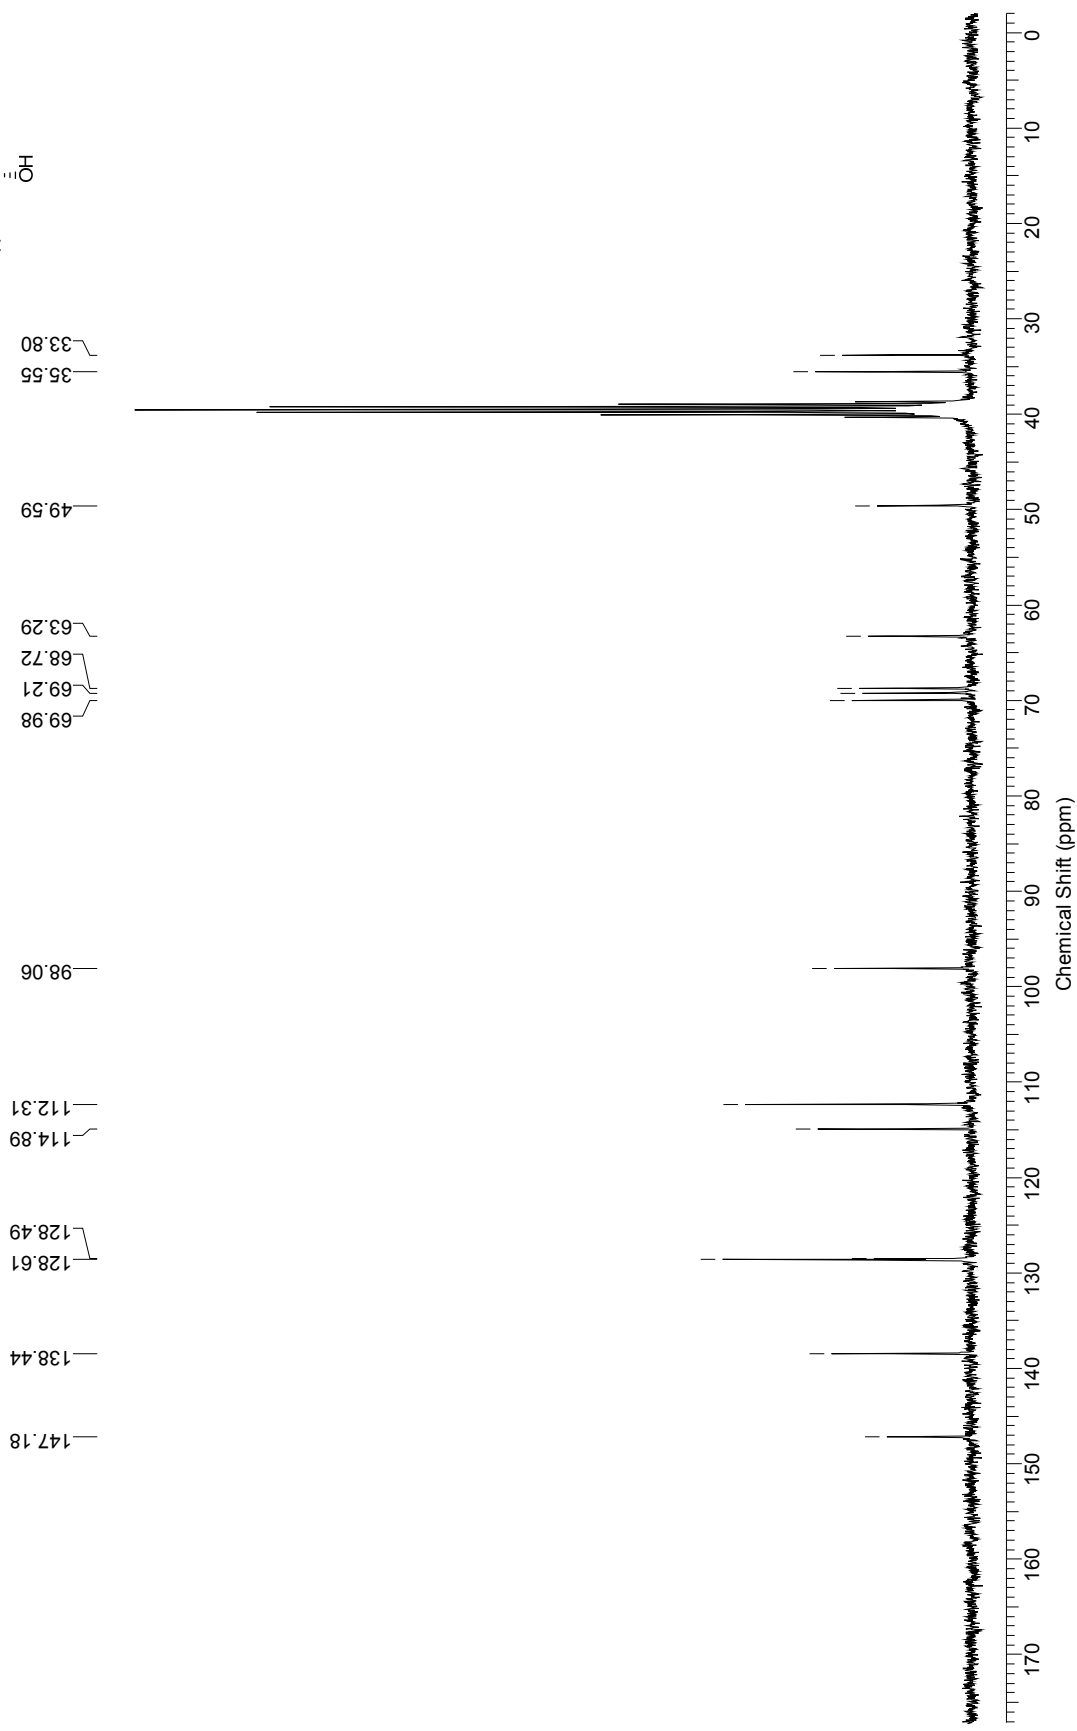

<sup>1</sup>H NMR for (3aR,6R,7S,7aS)-6-(((4-(But-3-en-1-yl)phenyl)amino)methyl)-2,2-dimethyltetrahydro-3aH-[1,3]dioxolo[4,5-c]pyran-6,7-diol (**3**).

[300 MHz, CDCl<sub>3</sub>]

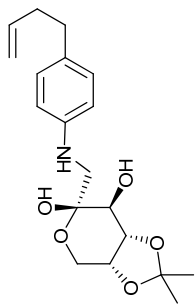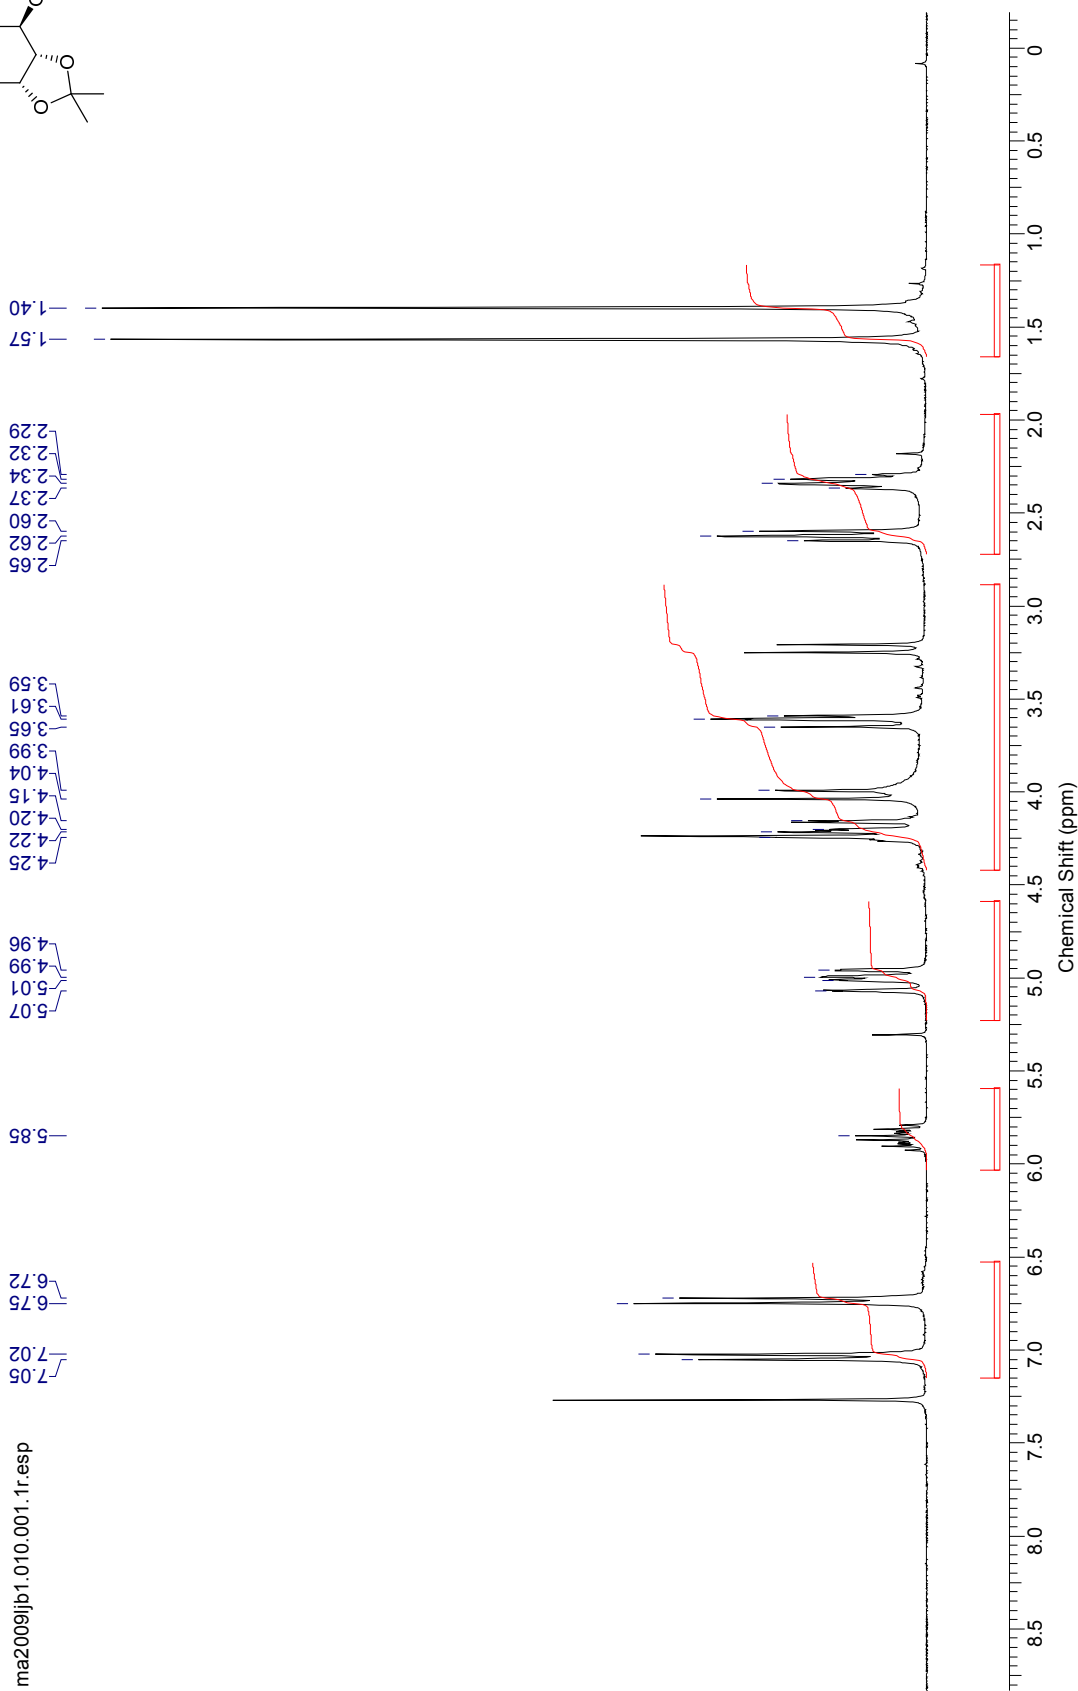

$^{13}\text{C}$  NMR for (3*aR*,6*R*,7*S*,7*aS*)-6-(((4-(But-3-en-1-yl)phenyl)amino)methyl)-2,2-dimethyltetrahydro-3*aH*-[1,3]dioxolo[4,5-*c*]pyran-6,7-diol (**3**).

[75 MHz,  $\text{CDCl}_3$ ]

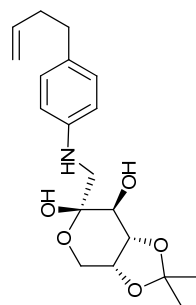

MA2009LJB1.011.001.1R.ESP

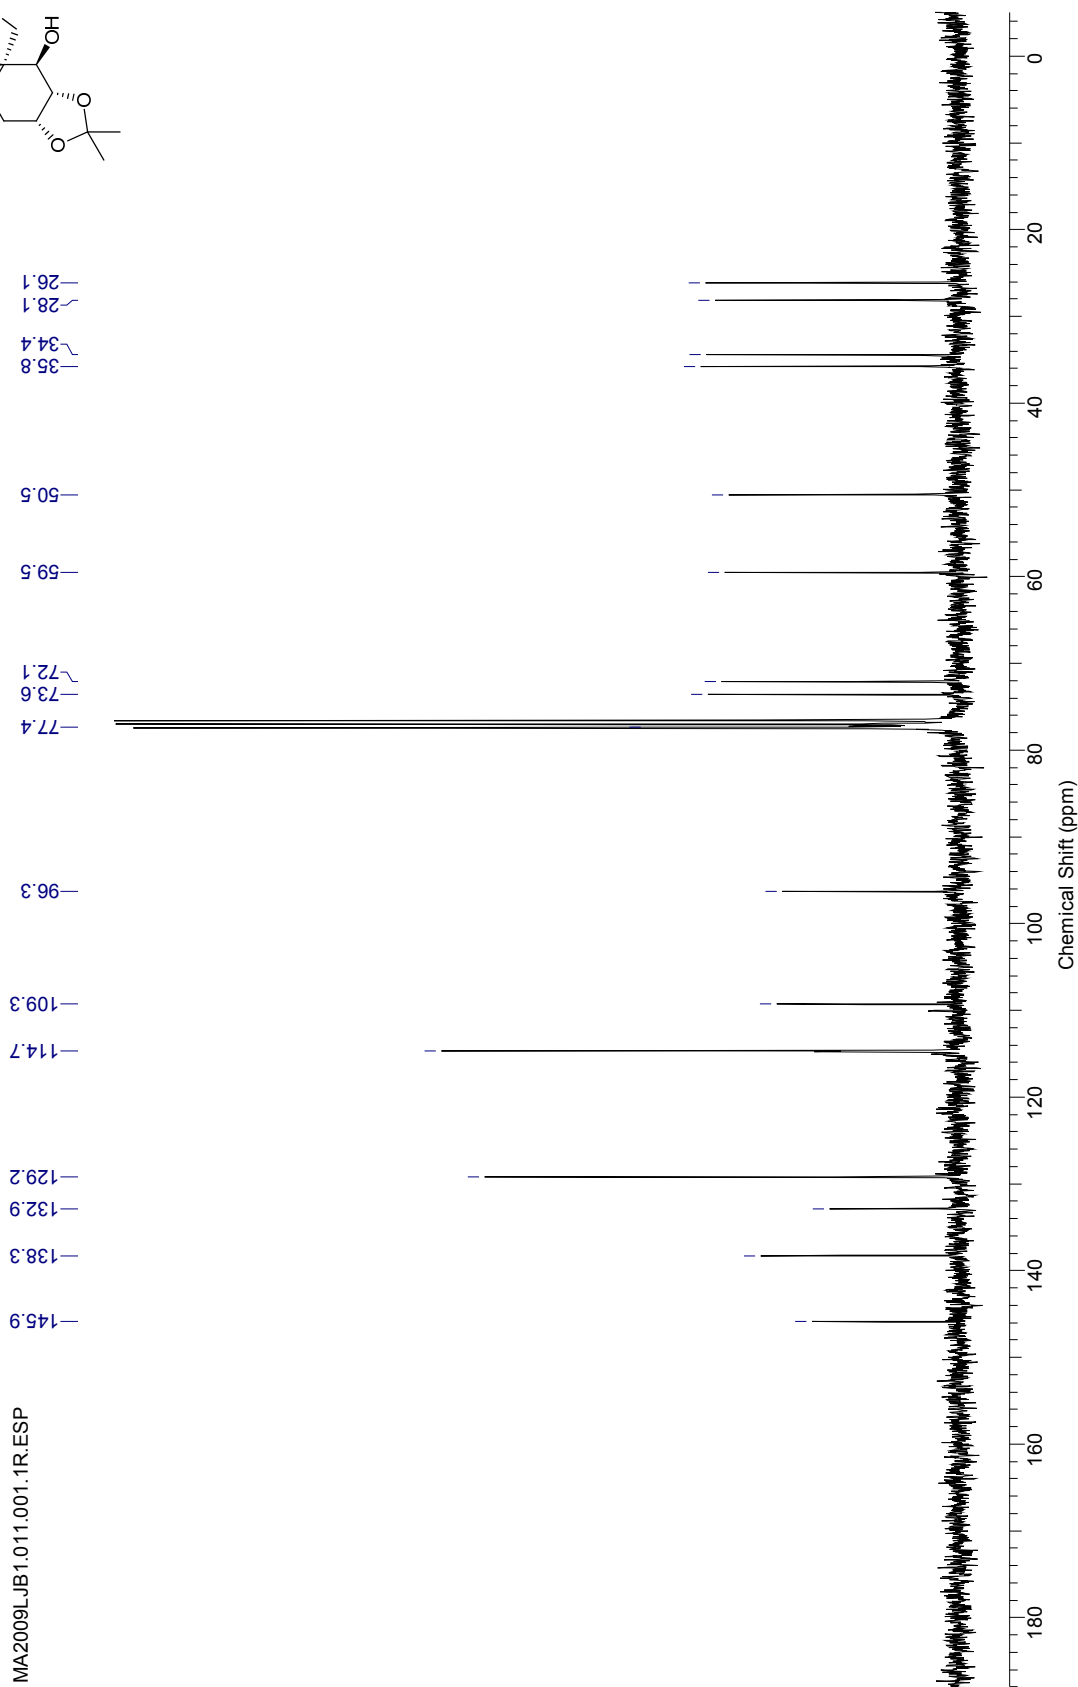

<sup>1</sup>H NMR for (3aR,5'S,7S,7aS)-3'-(4-(But-3-en-1-yl)phenyl)-7-hydroxy-2,2-dimethyltetrahydrospiro[[1,3]dioxolo[4,5-c]pyran-6,5'-oxazolidin]-2'-one (**4**).

[300 MHz, CDCl<sub>3</sub>]

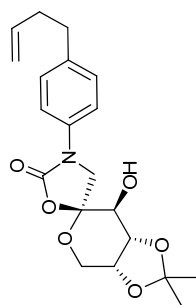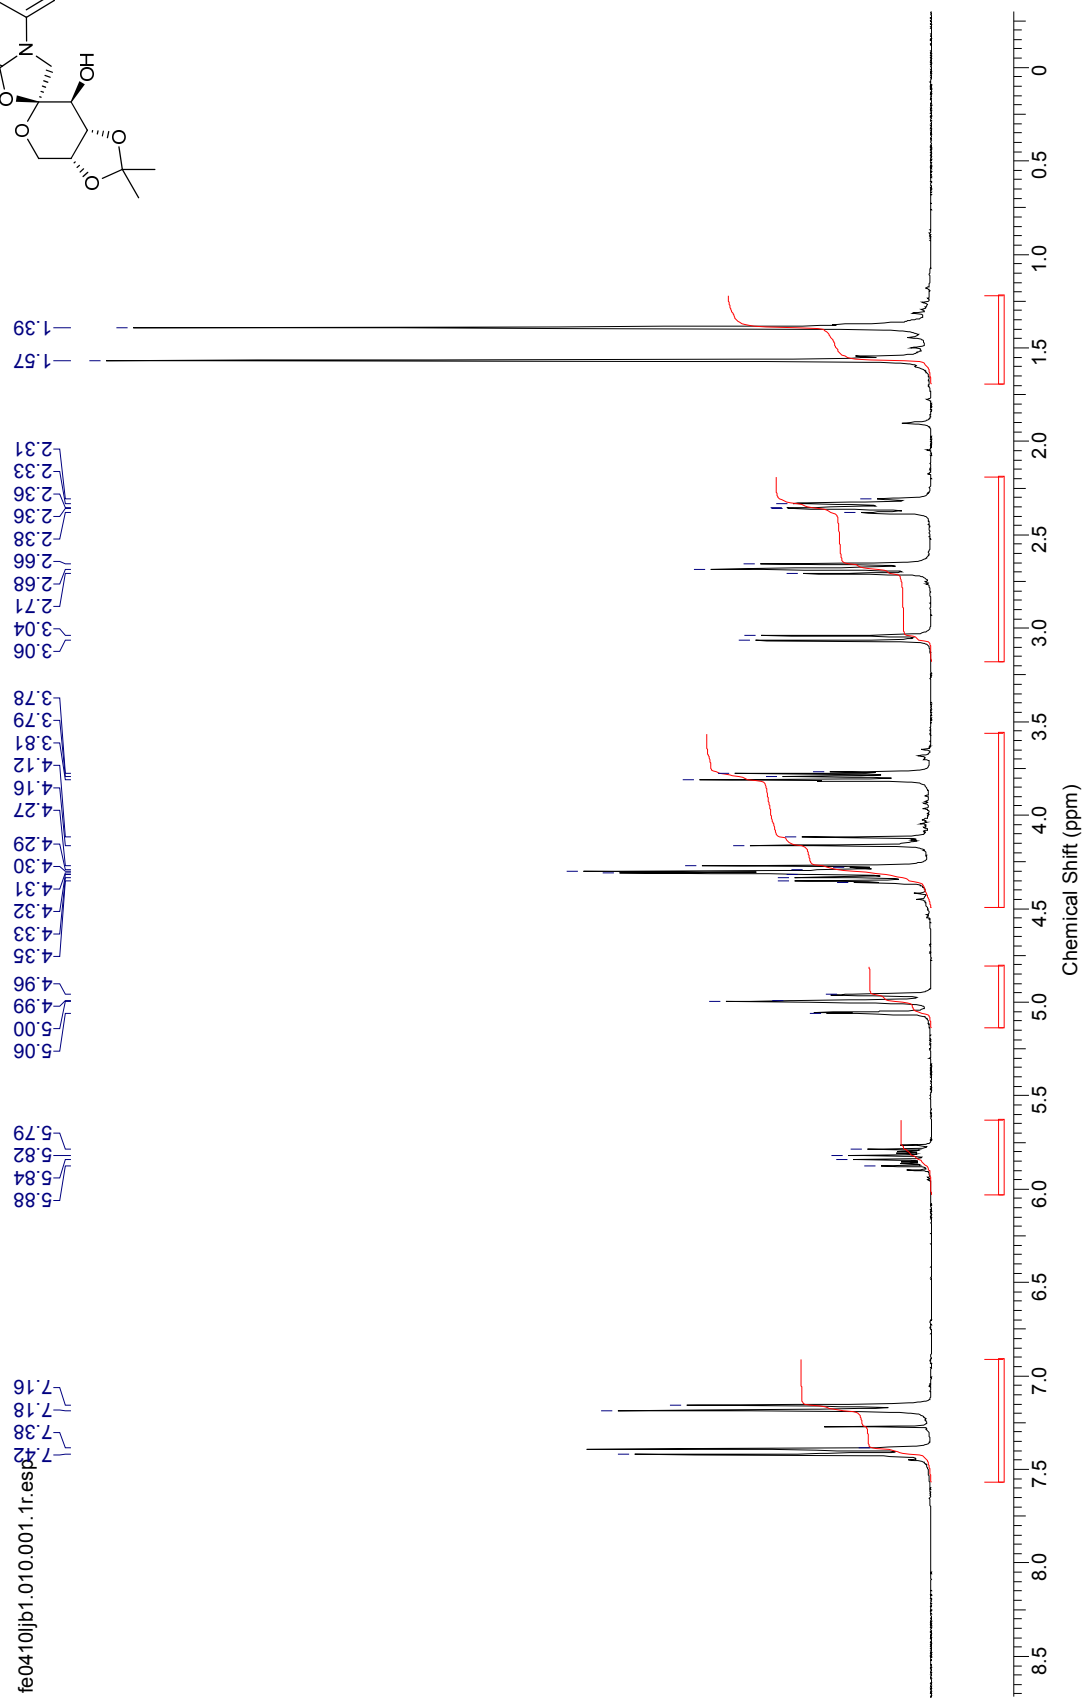



$^{13}\text{C}$  NMR for (3*R*,5*S*,7*S*,7*aS*)-3'-(4-(*n*-But-3-en-1-yl)phenyl)-7-hydroxy-2,2-dimethyltetrahydrospiro[[1,3]dioxolo[4,5-*c*]pyran-6,5'-oxazo lidin]-2'-one (**4**).

[75 MHz,  $\text{CDCl}_3$ ]

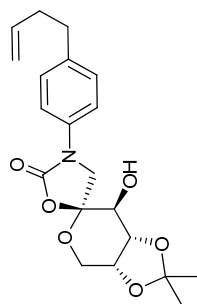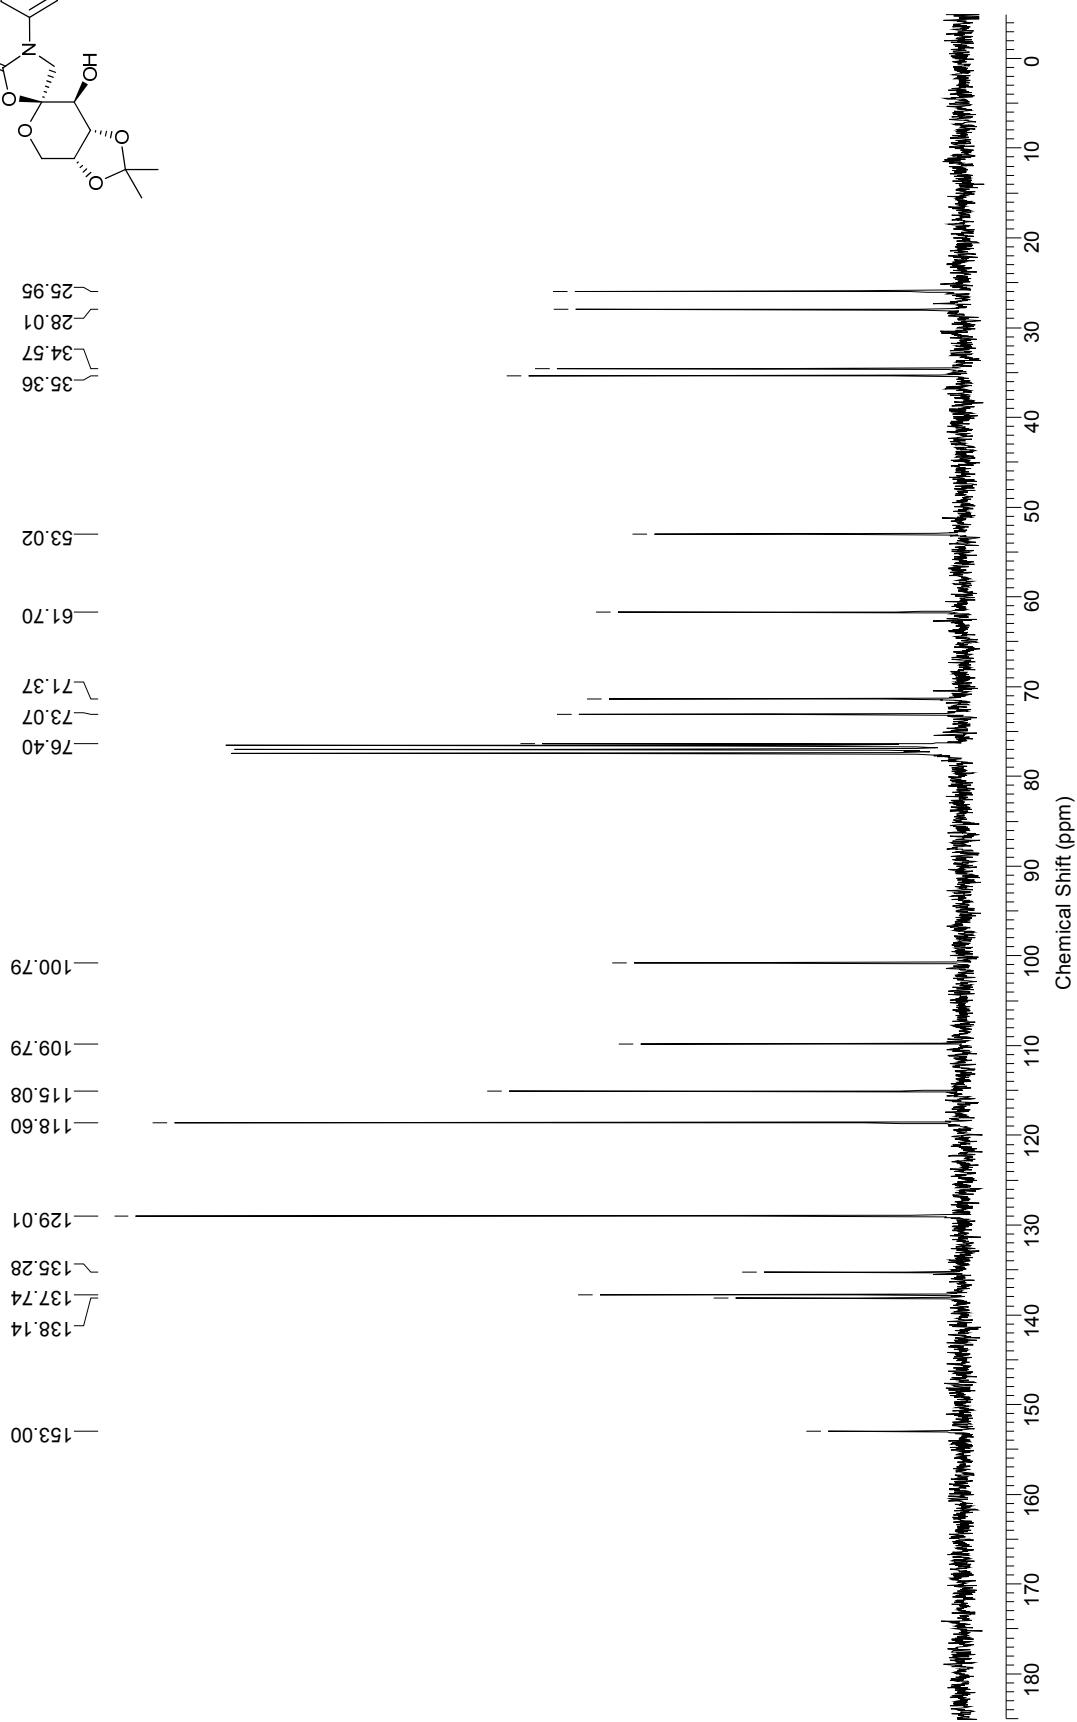

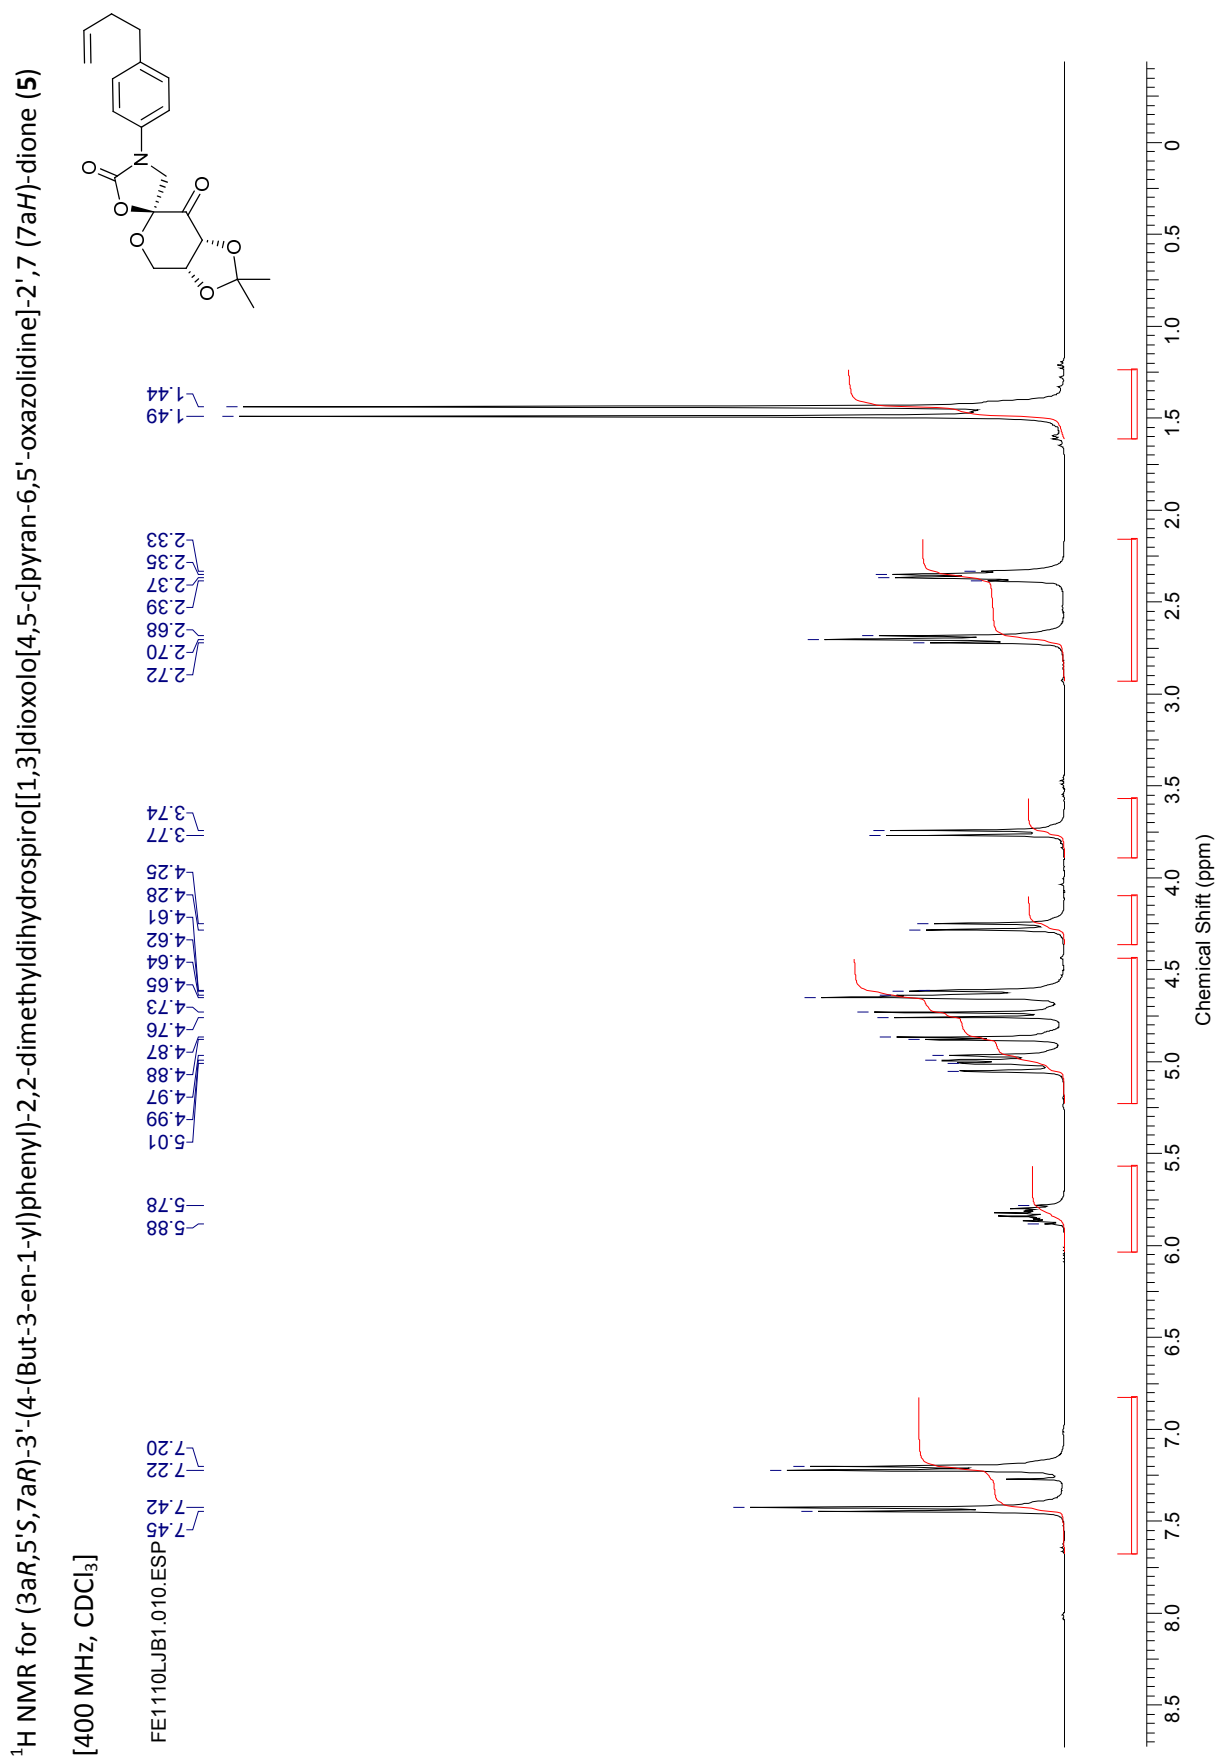

$^{13}\text{C}$  NMR for (3*aR*,5*S*,7*aR*)-3'-(4-(But-3-en-1-yl)phenyl)-2,2-dimethylhydrospiro[[1,3]dioxolo[4,5-*c*]pyran-6,5'-oxazolidine]-2',7 (7*aH*)-dione (**5**)

[100 MHz,  $\text{CDCl}_3$ ]

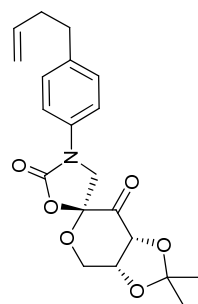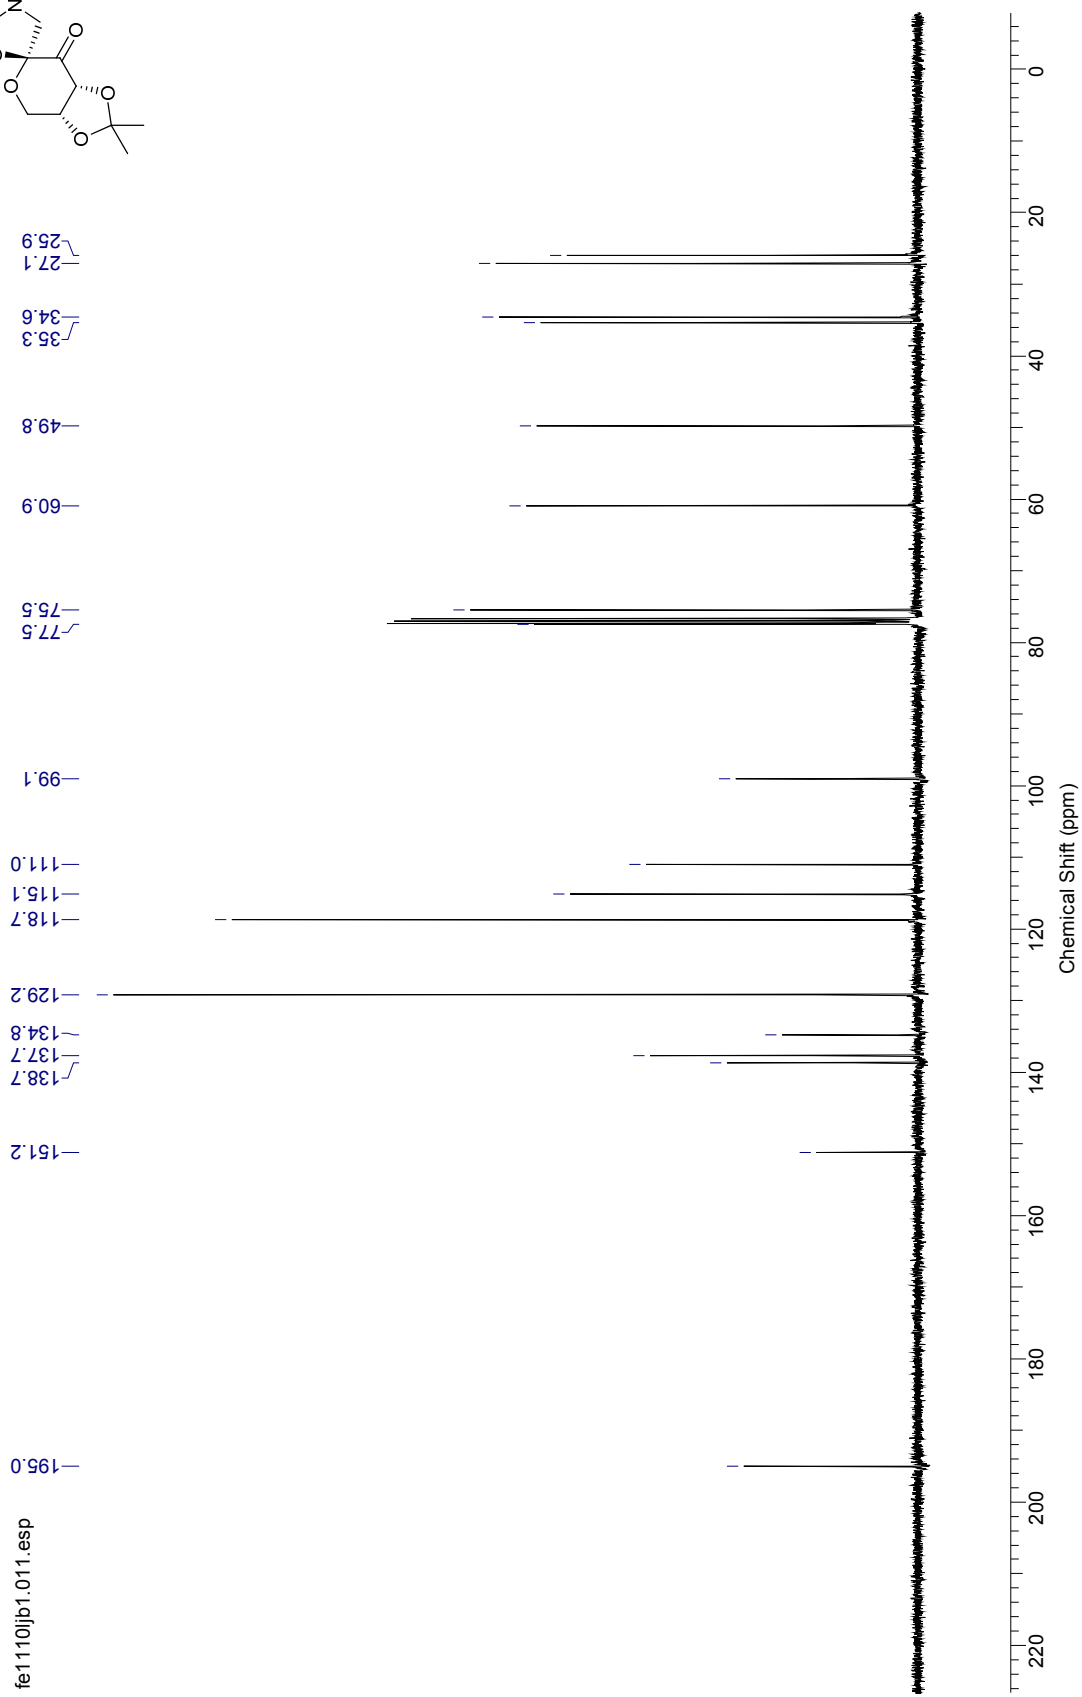

<sup>1</sup>H NMR for 4-(But-3-en-1-yl) aniline (7)

[400 MHz, CDCl<sub>3</sub>]

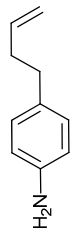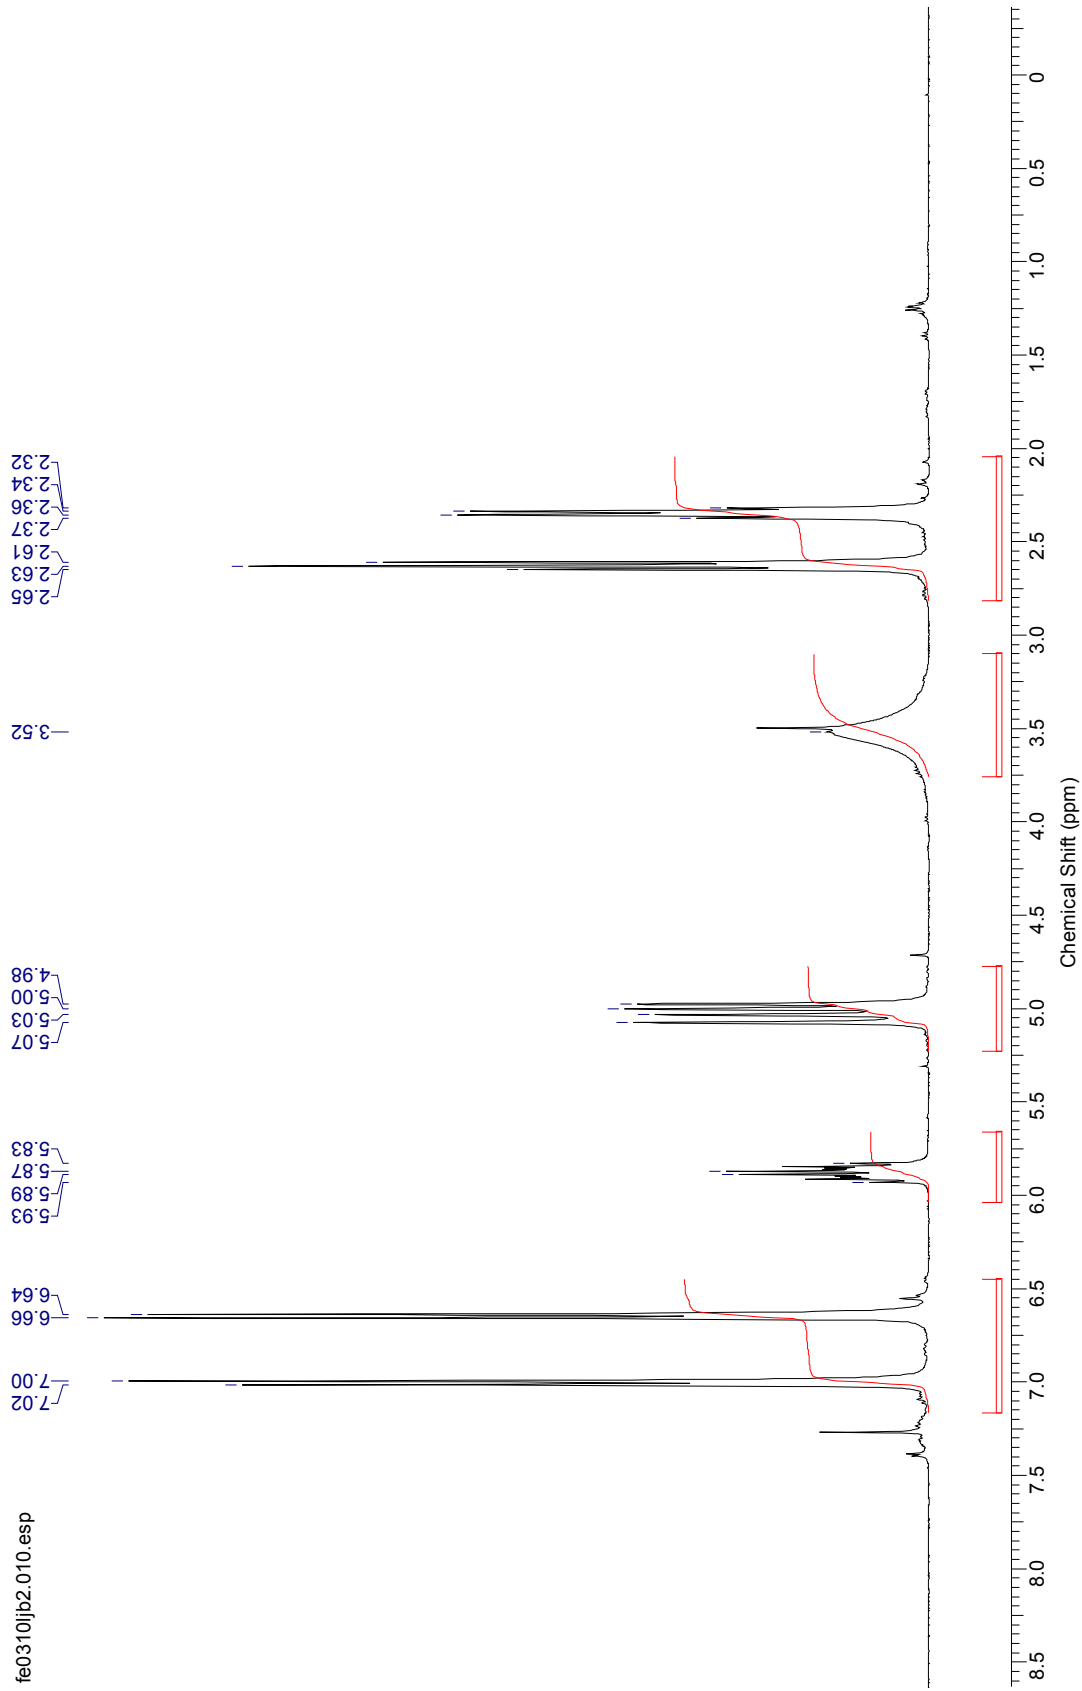

<sup>13</sup>C NMR for 4-(But-3-en-1-yl) aniline (**7**)

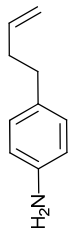

[100 MHz, CDCl<sub>3</sub>]

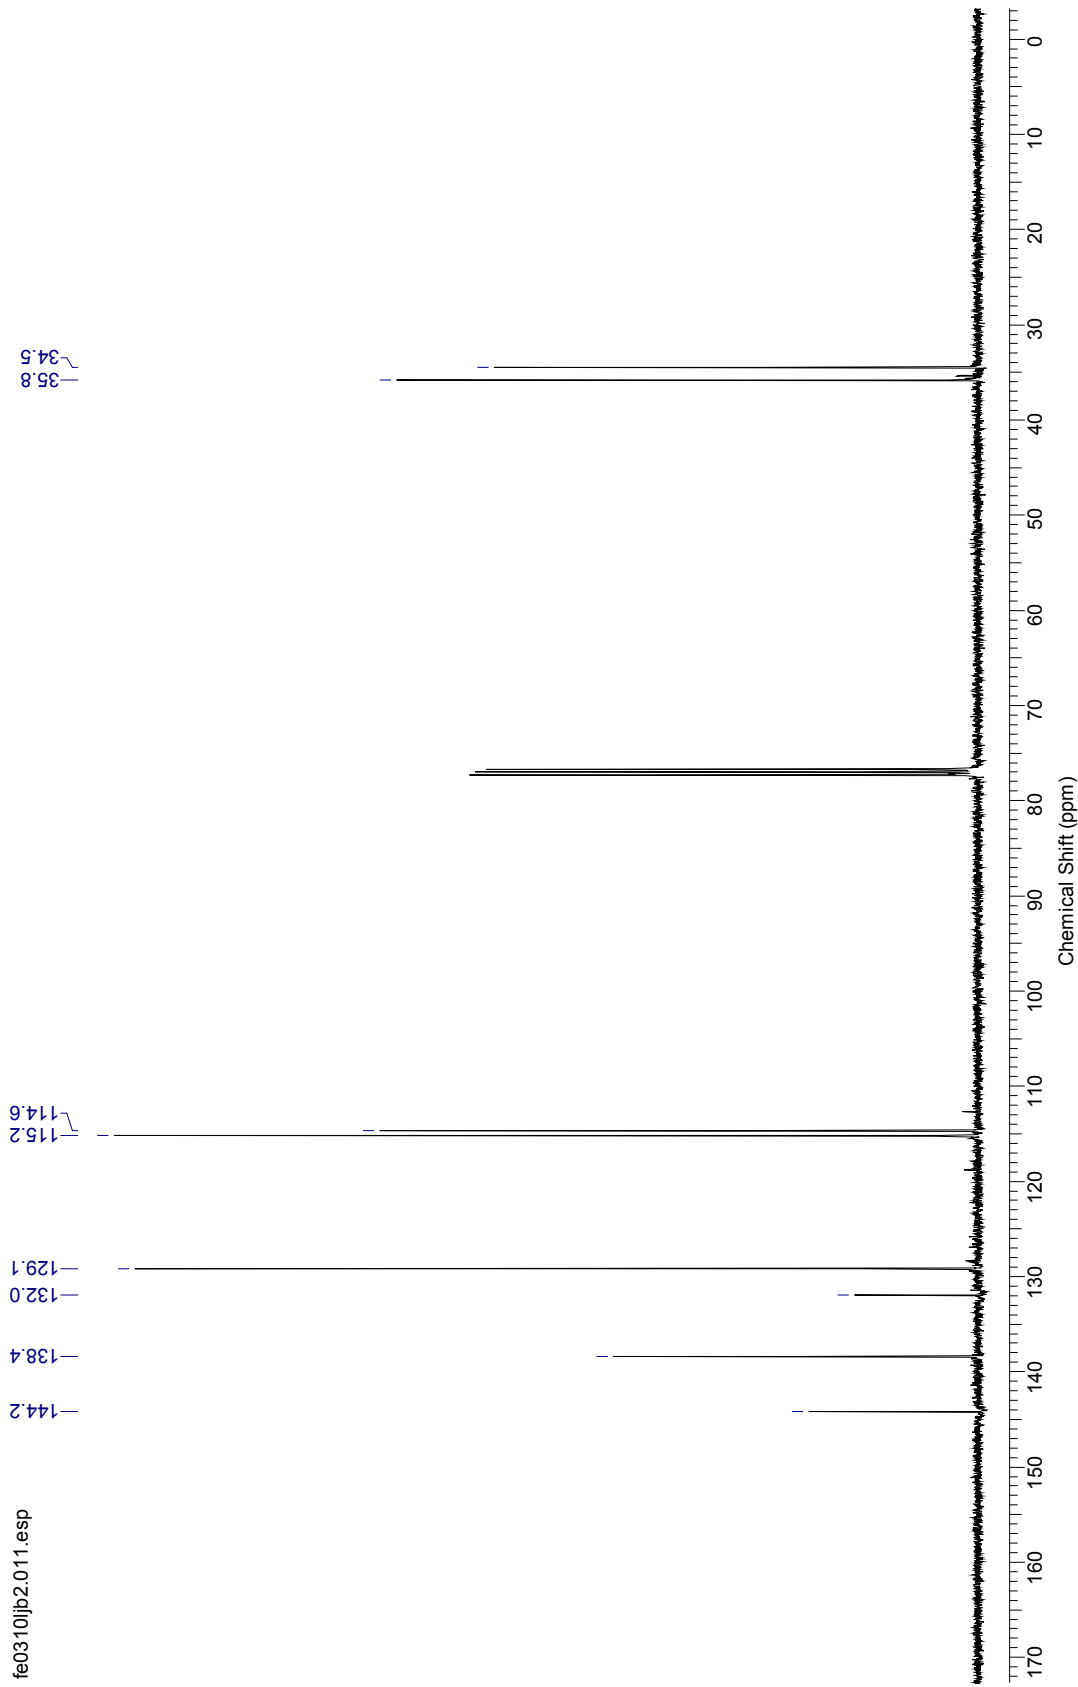

<sup>29</sup>Si NMR Sílica **8a**

[79.4 MHz, CP: linear ramp on H, spin rate 6800 Hz]

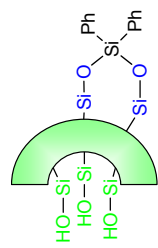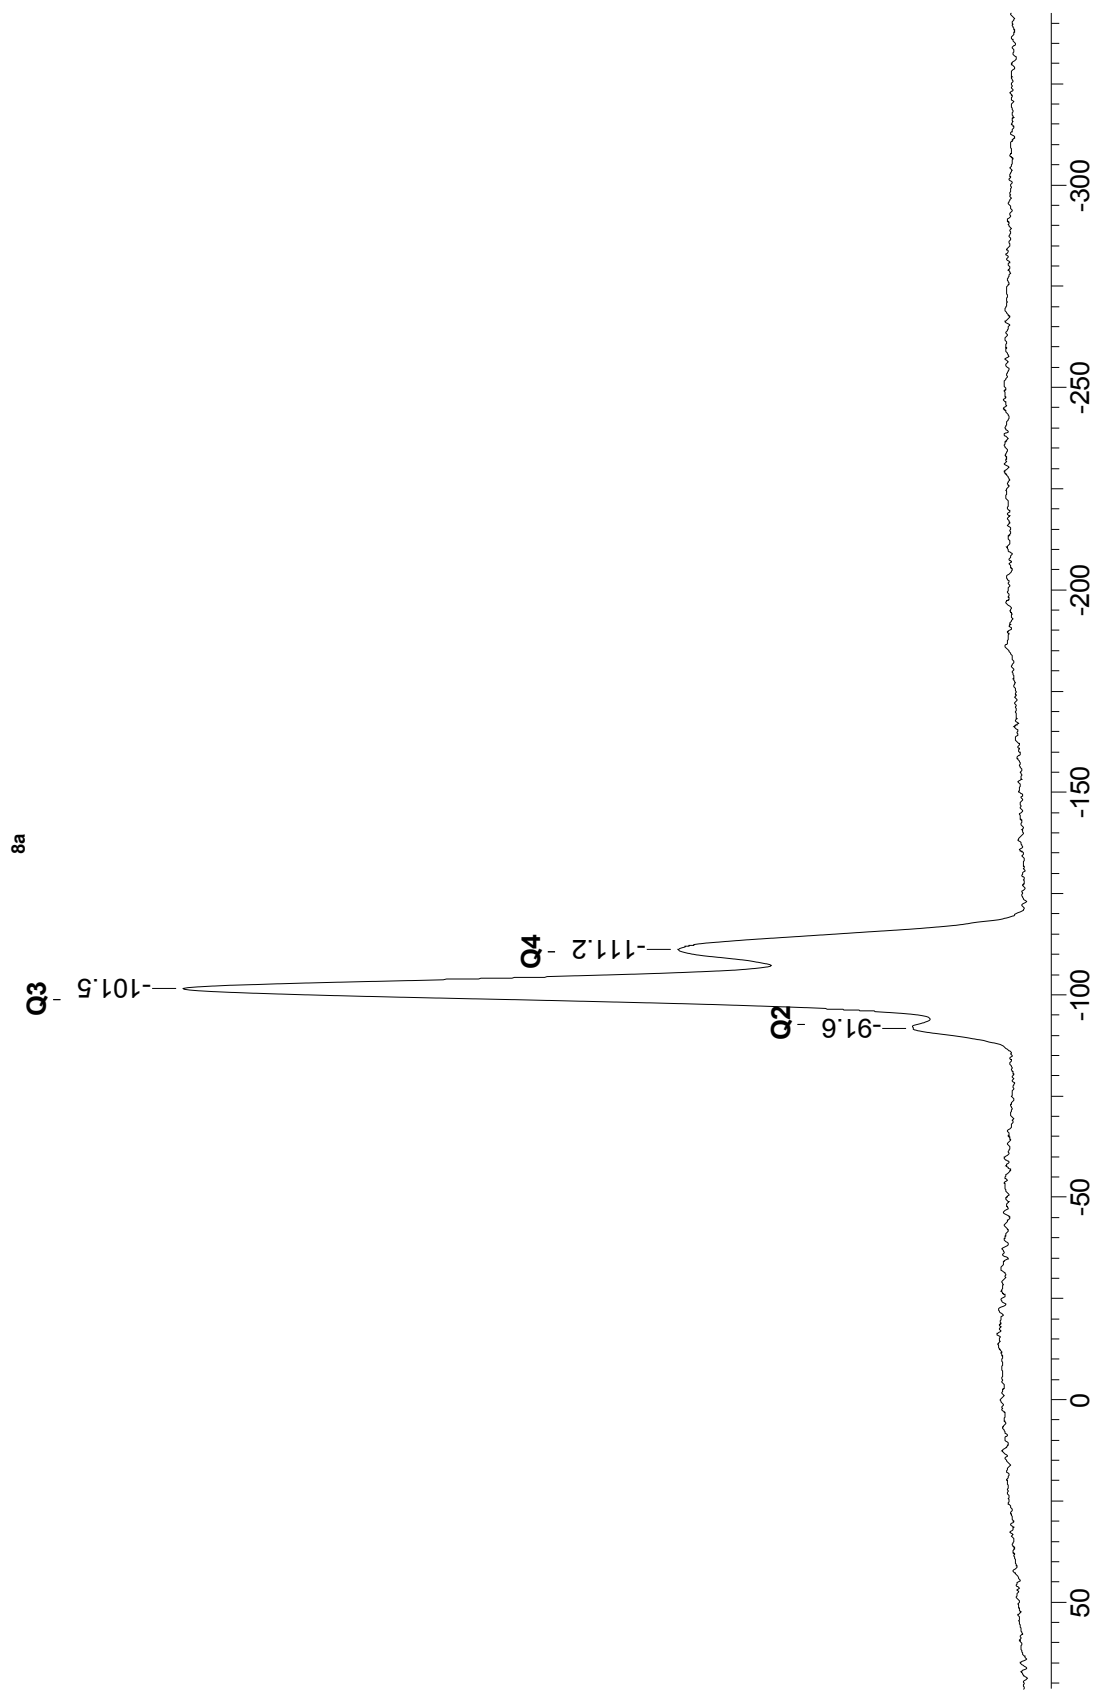

<sup>29</sup>Si NMR Sílica **9a**

[79.4 MHz, CP: linear ramp on H, spin rate 6800 Hz]

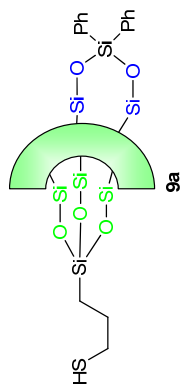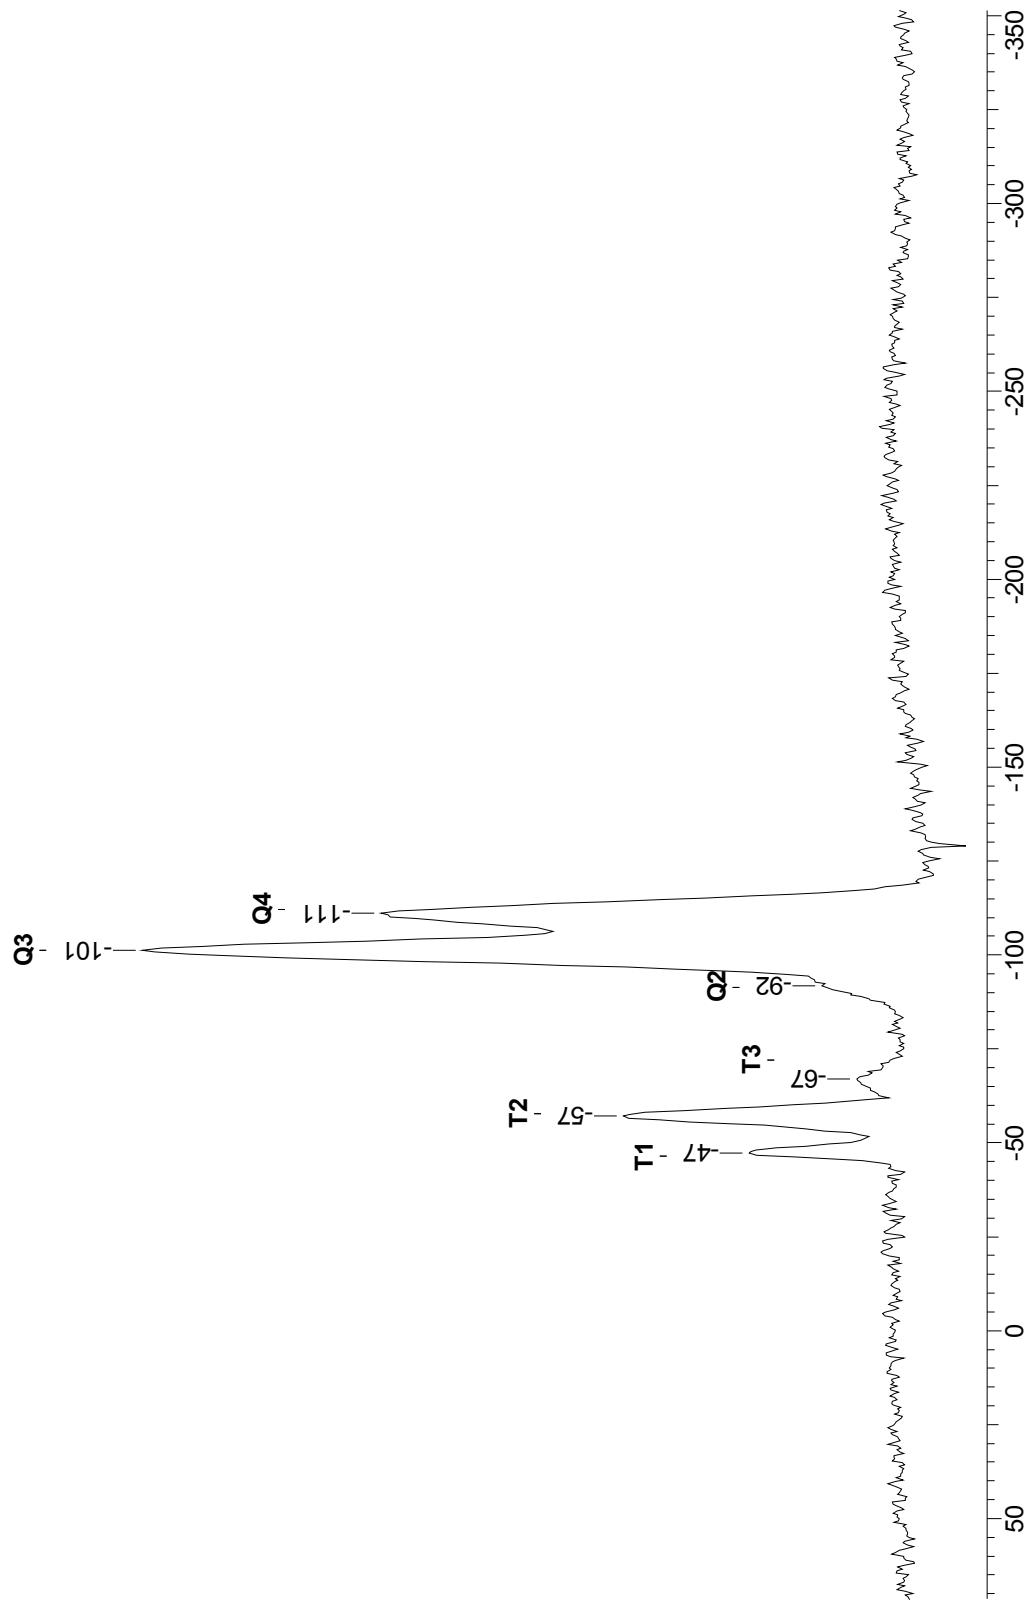

<sup>13</sup>C NMR Sílica **9a**

[100 MHz, CP: linear ramp on H, spin rate 6800 Hz]

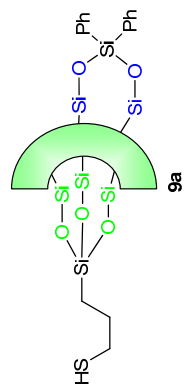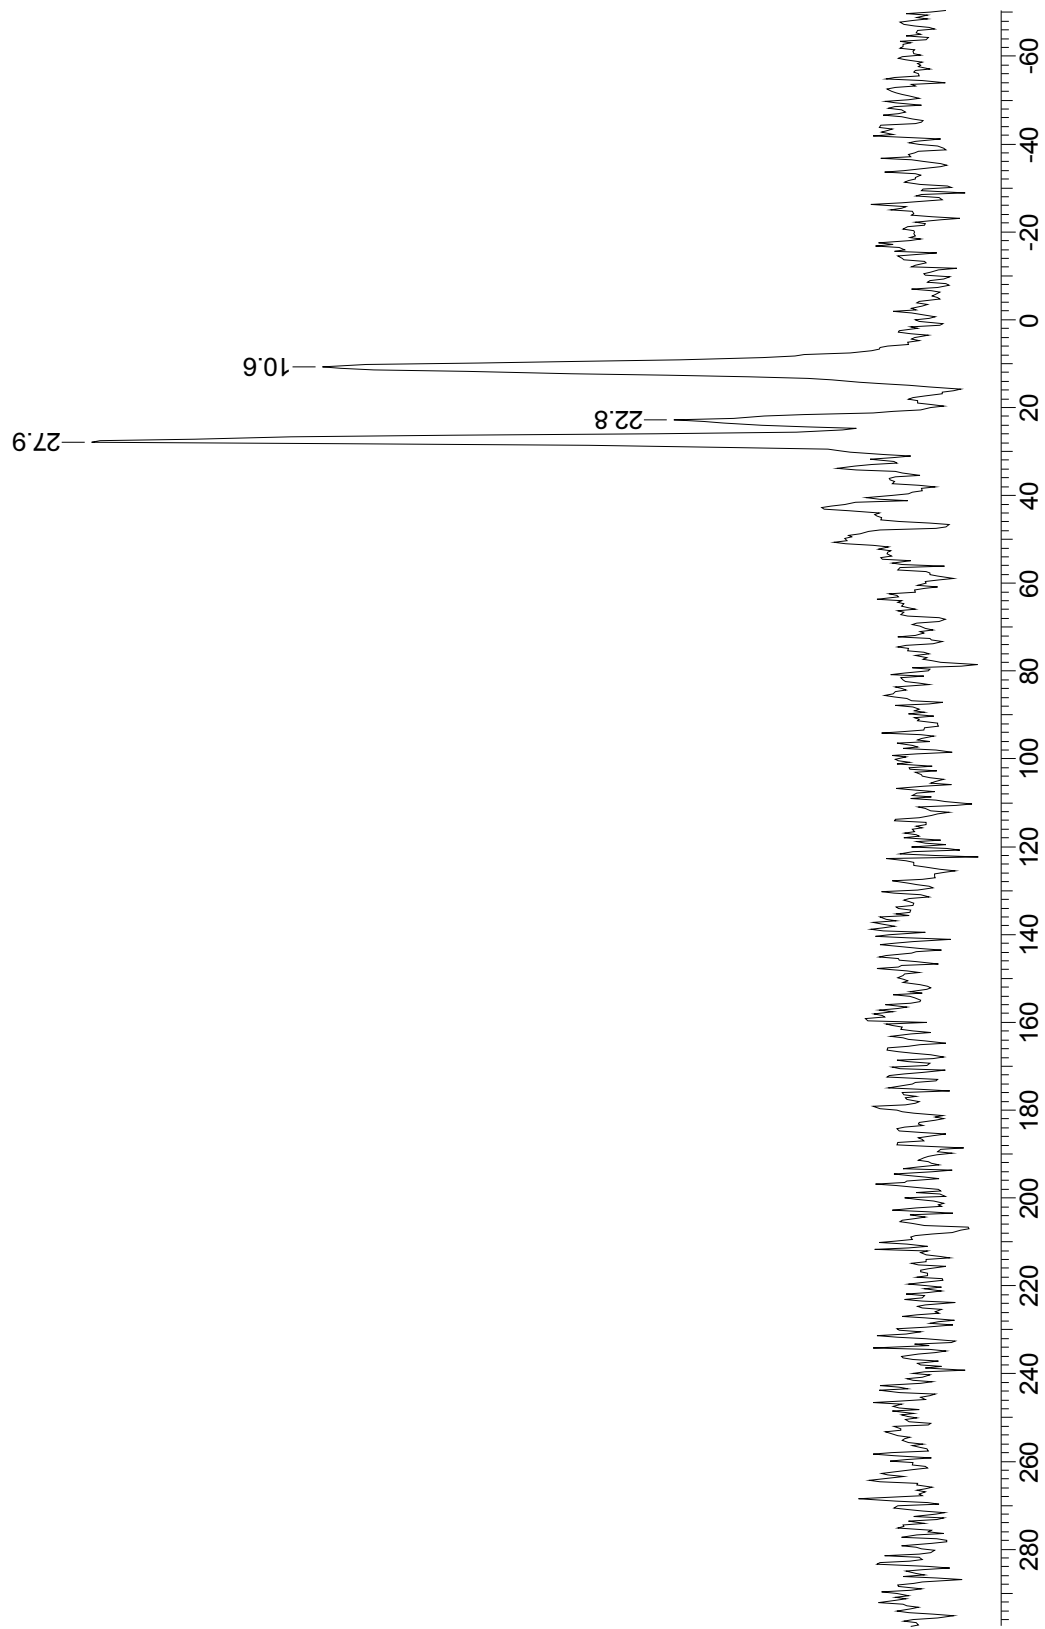



<sup>29</sup>Si NMR Silica **10a**

[79.4 MHz, CP: linear ramp on H, spin rate 6800 Hz]

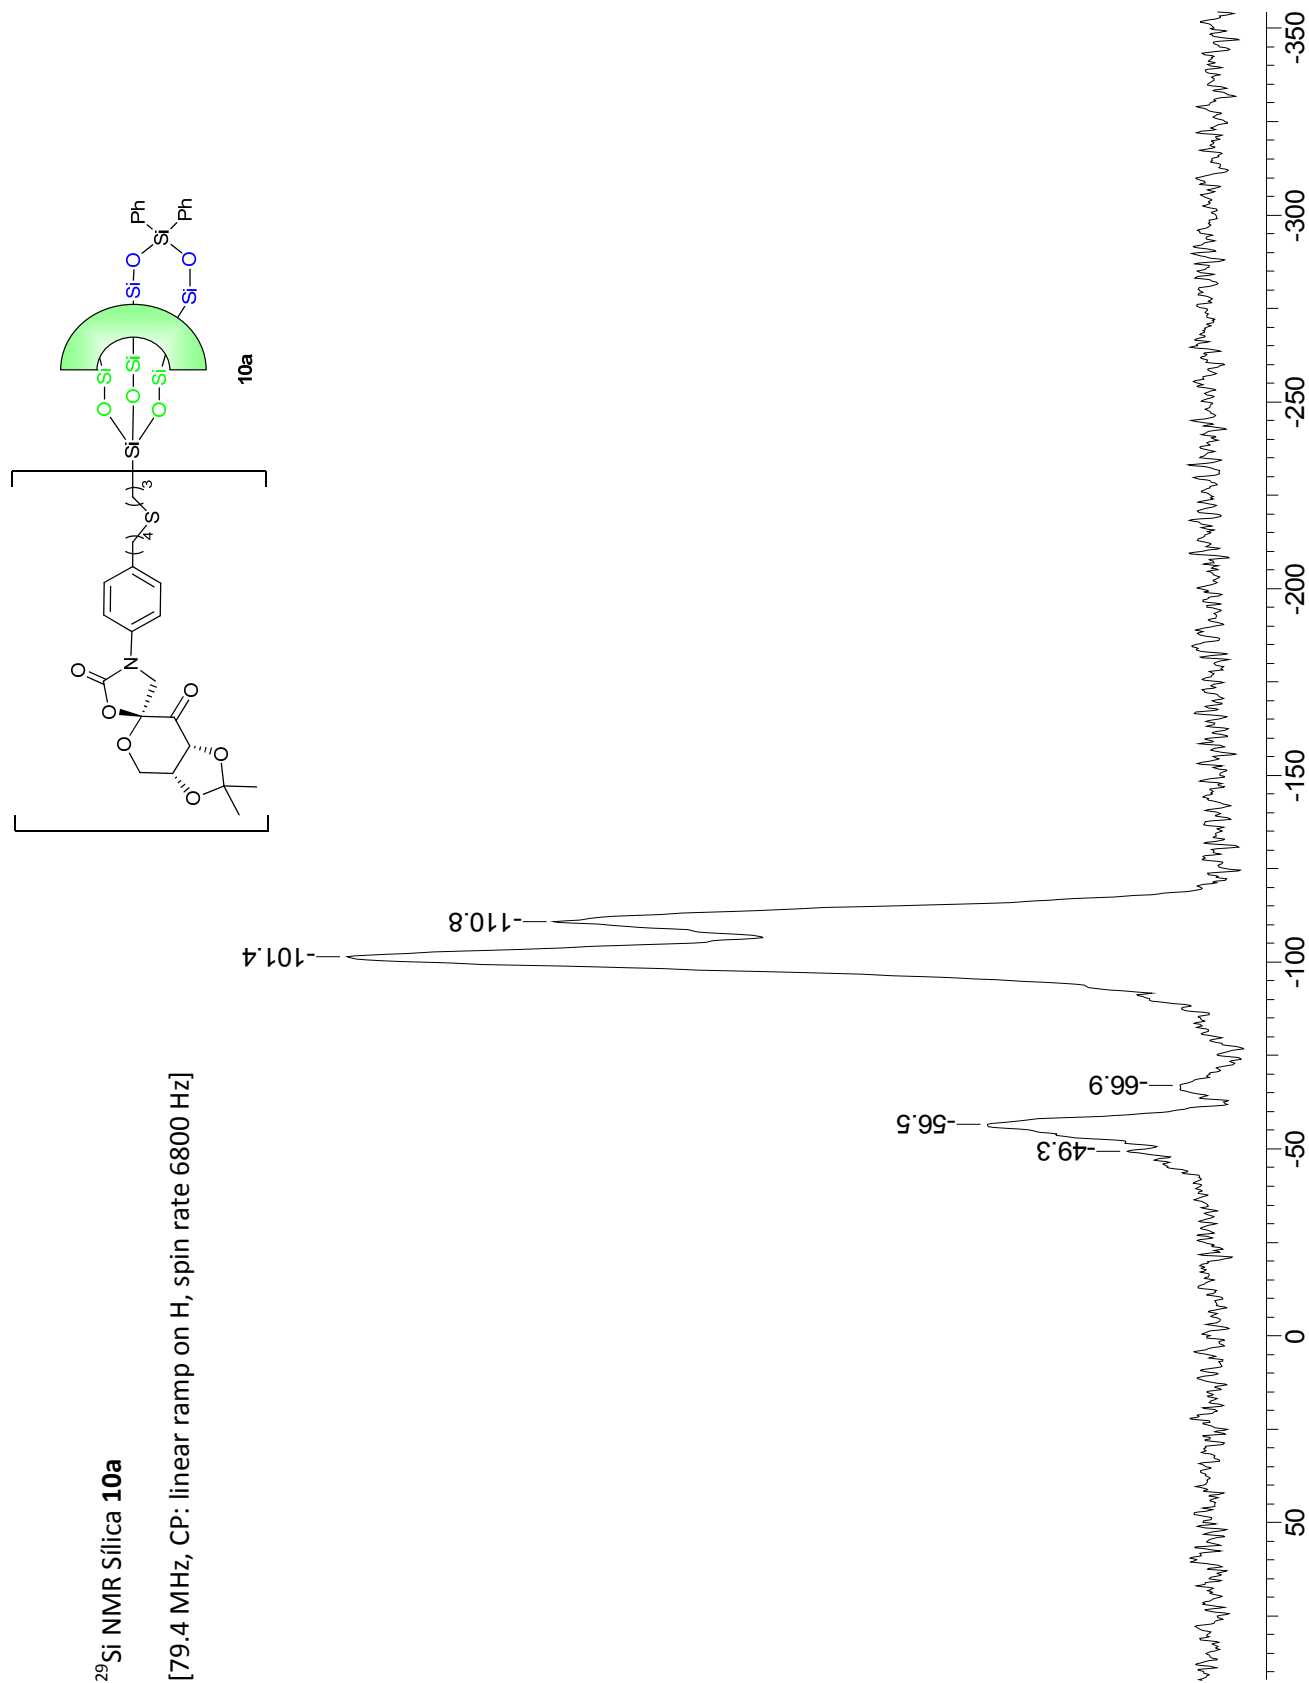

<sup>13</sup>C NMR Sílica **10a**

[100 MHz, CP: linear ramp on H, spin rate 6800 Hz]

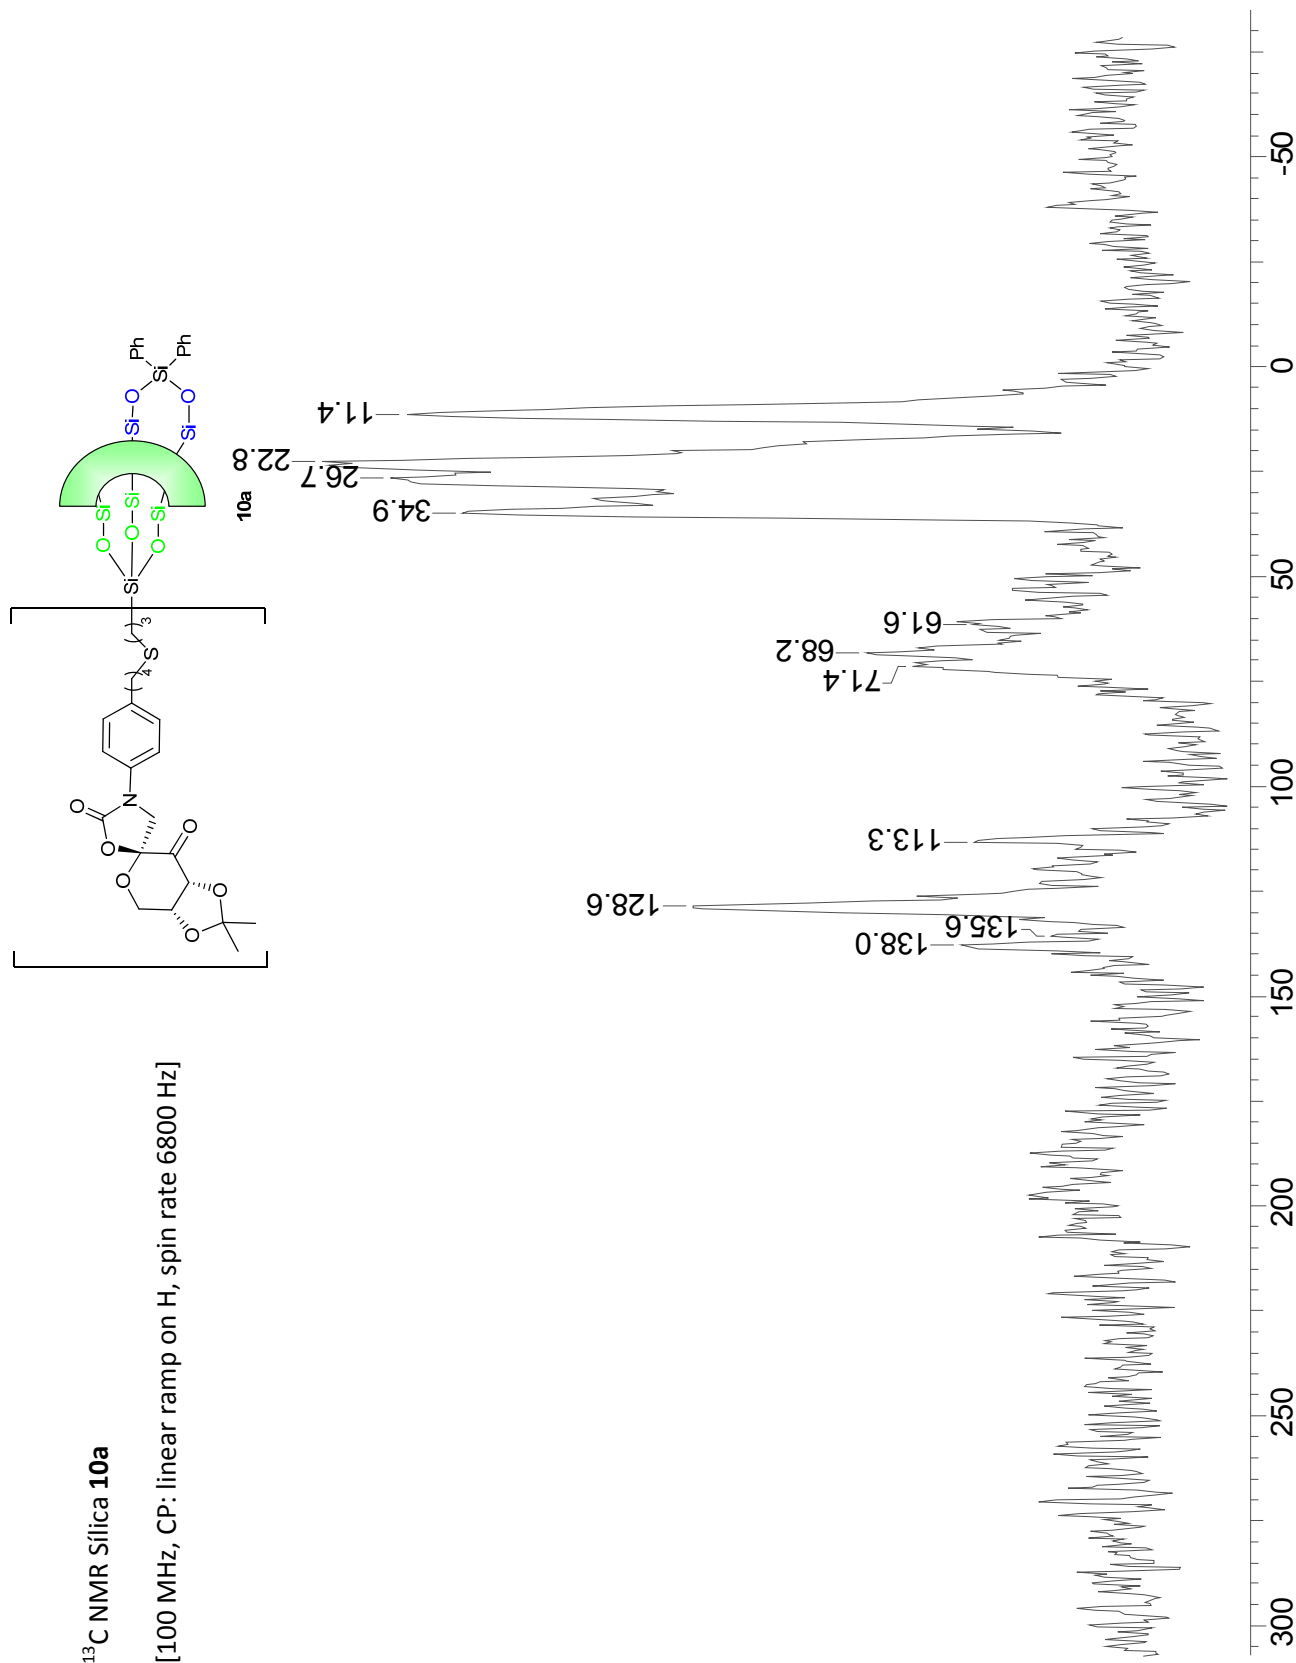

### NMR spectroscopic data (epoxides)

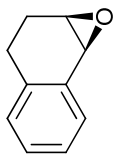

<sup>1</sup>H NMR (1*S*,2*R*)- 1,2-dihydronaphthalene oxide (table 4, entry 1)  
[400 MHz, CDCl<sub>3</sub>]

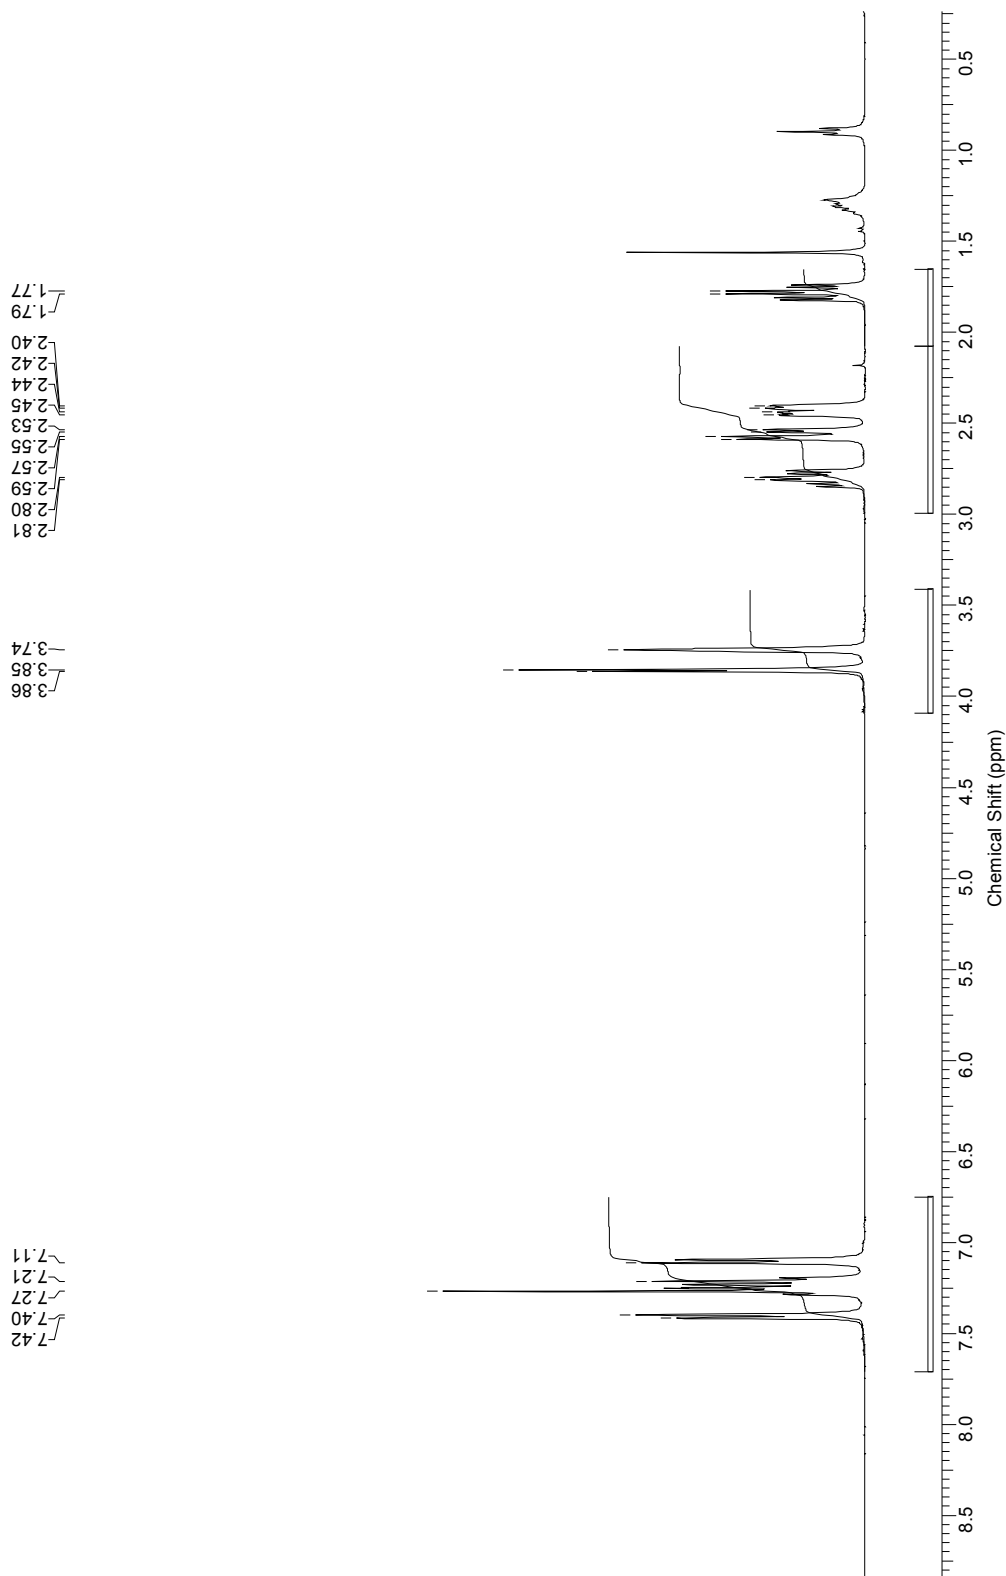

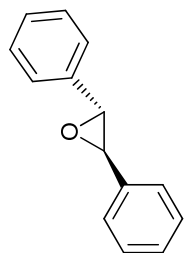

$^1\text{H}$  NMR (*R,R*)-*trans*-stilbene oxide (table 4, entry 2)  
[300 MHz,  $\text{CDCl}_3$ ]

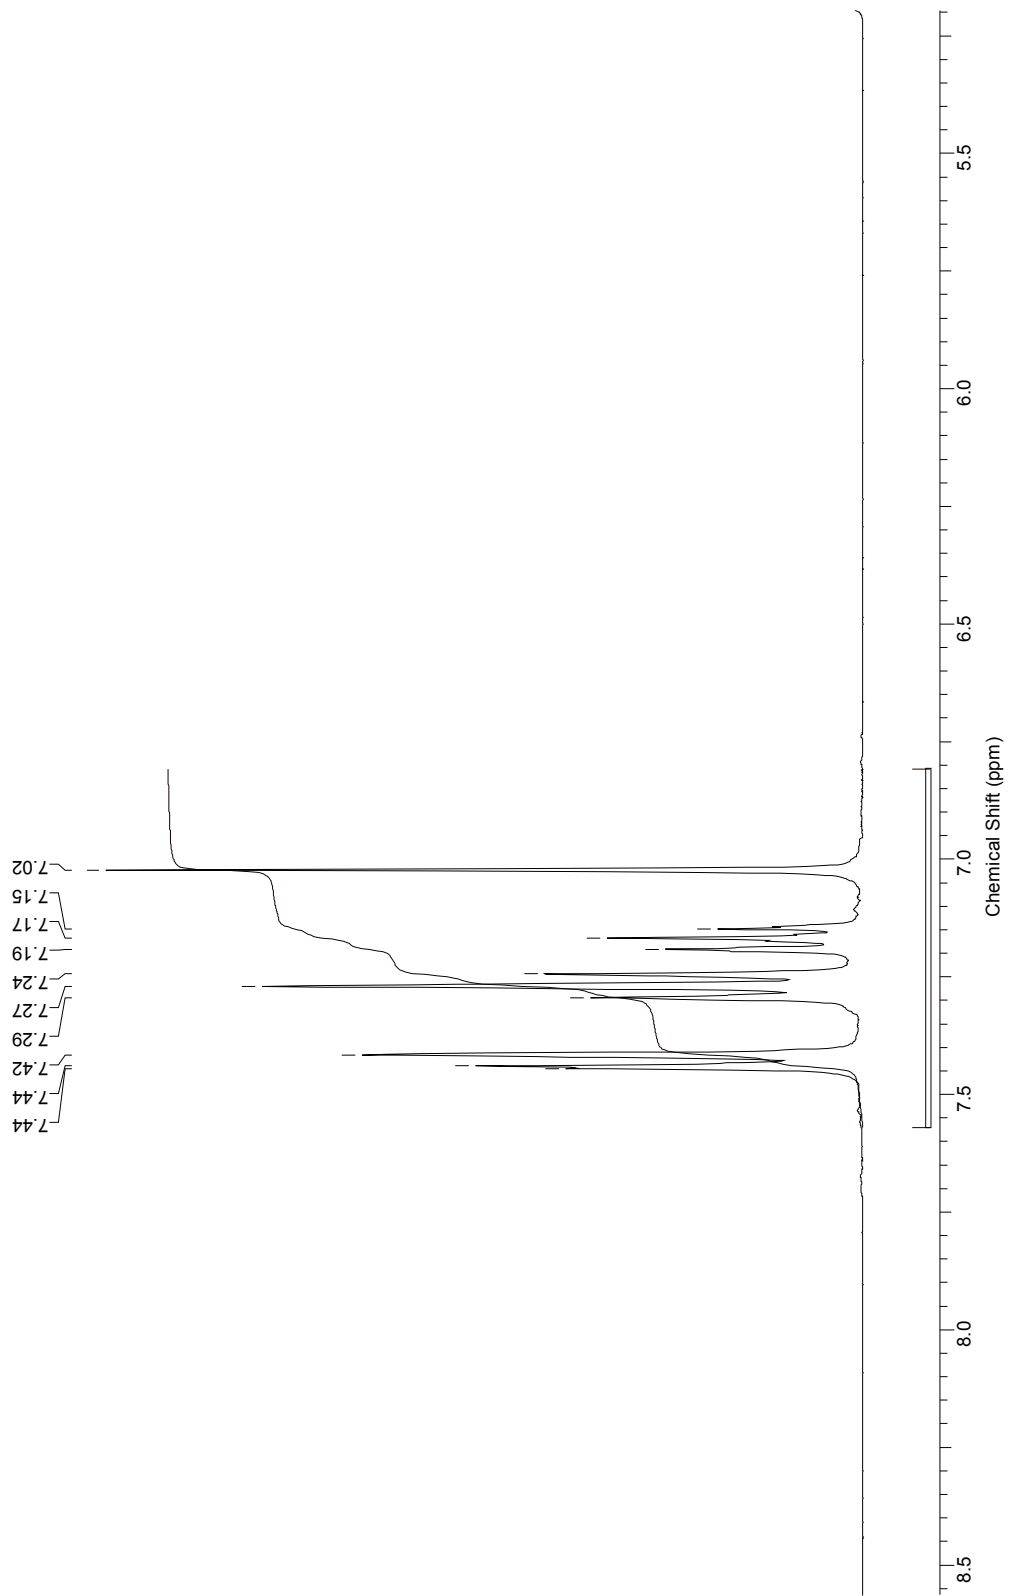

<sup>1</sup>H NMR (3R,4R)-2,2-dimethyl-6-cyano-chromene oxide (table 4, entry 3)  
[300 MHz, CDCl<sub>3</sub>]

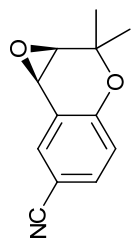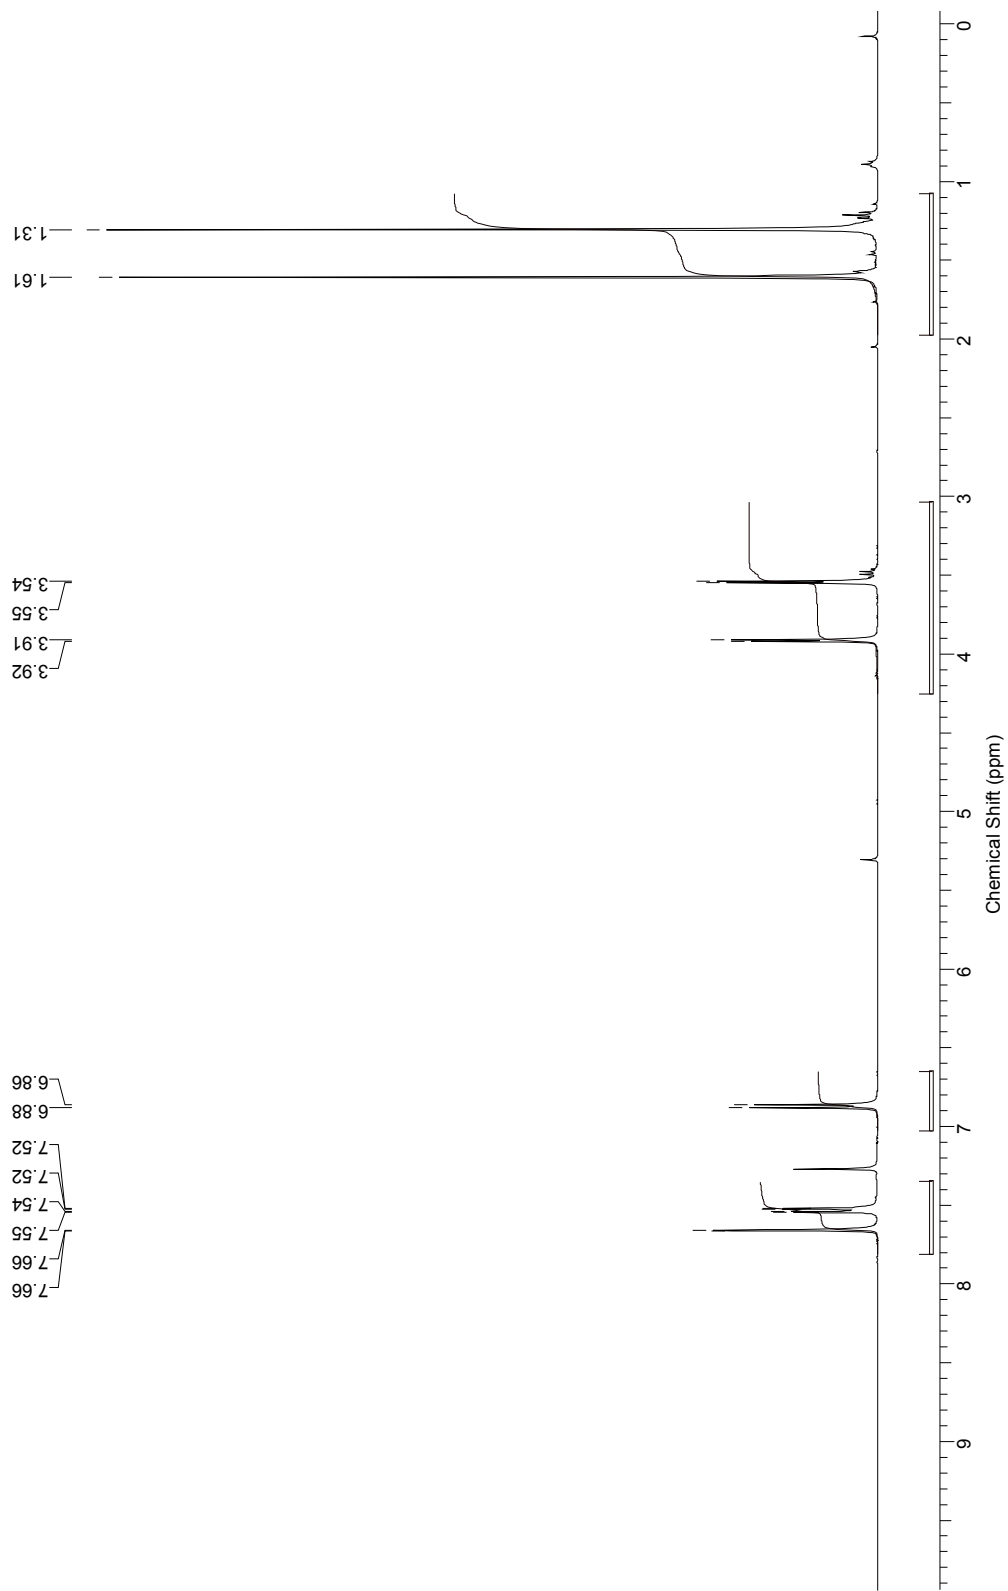

<sup>1</sup>H NMR (3*R*,4*R*)-2,2-dimethylchromene oxide (table 4, entry 4)  
[400 MHz, CDCl<sub>3</sub>]

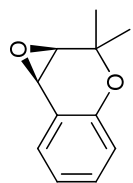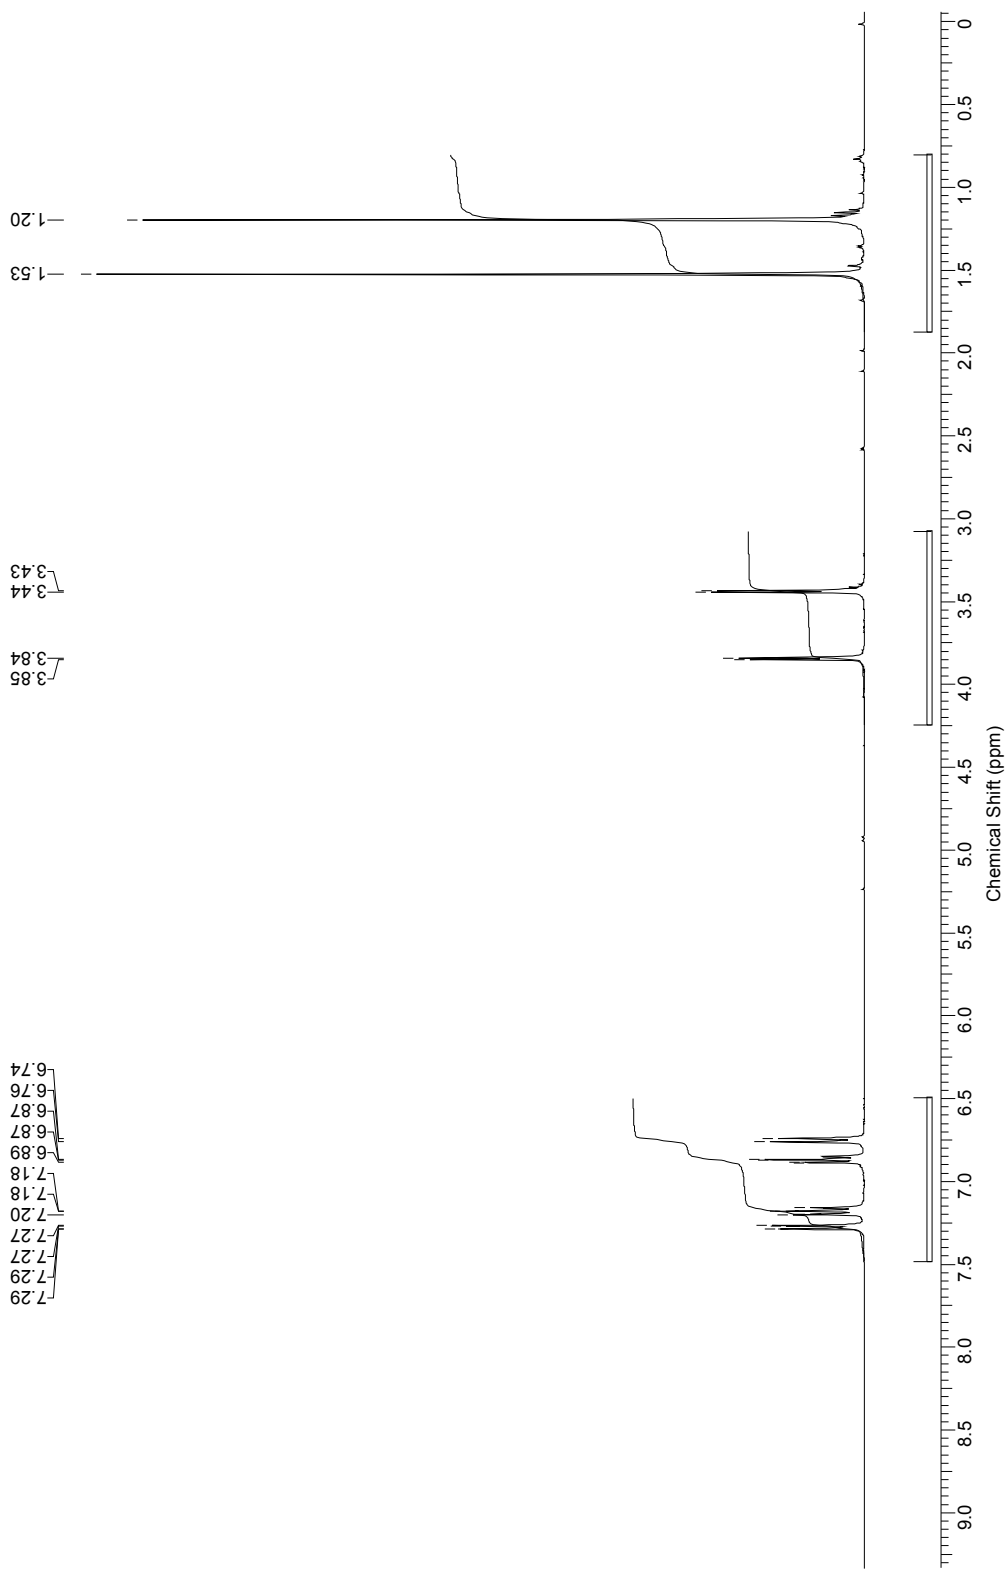

<sup>1</sup>H NMR (3*R*,4*R*)-2,2-dimethyl-6-chloro-chromene oxide (table 4, entry 5)  
[300 MHz, CDCl<sub>3</sub>]

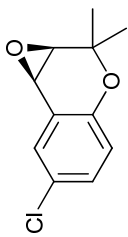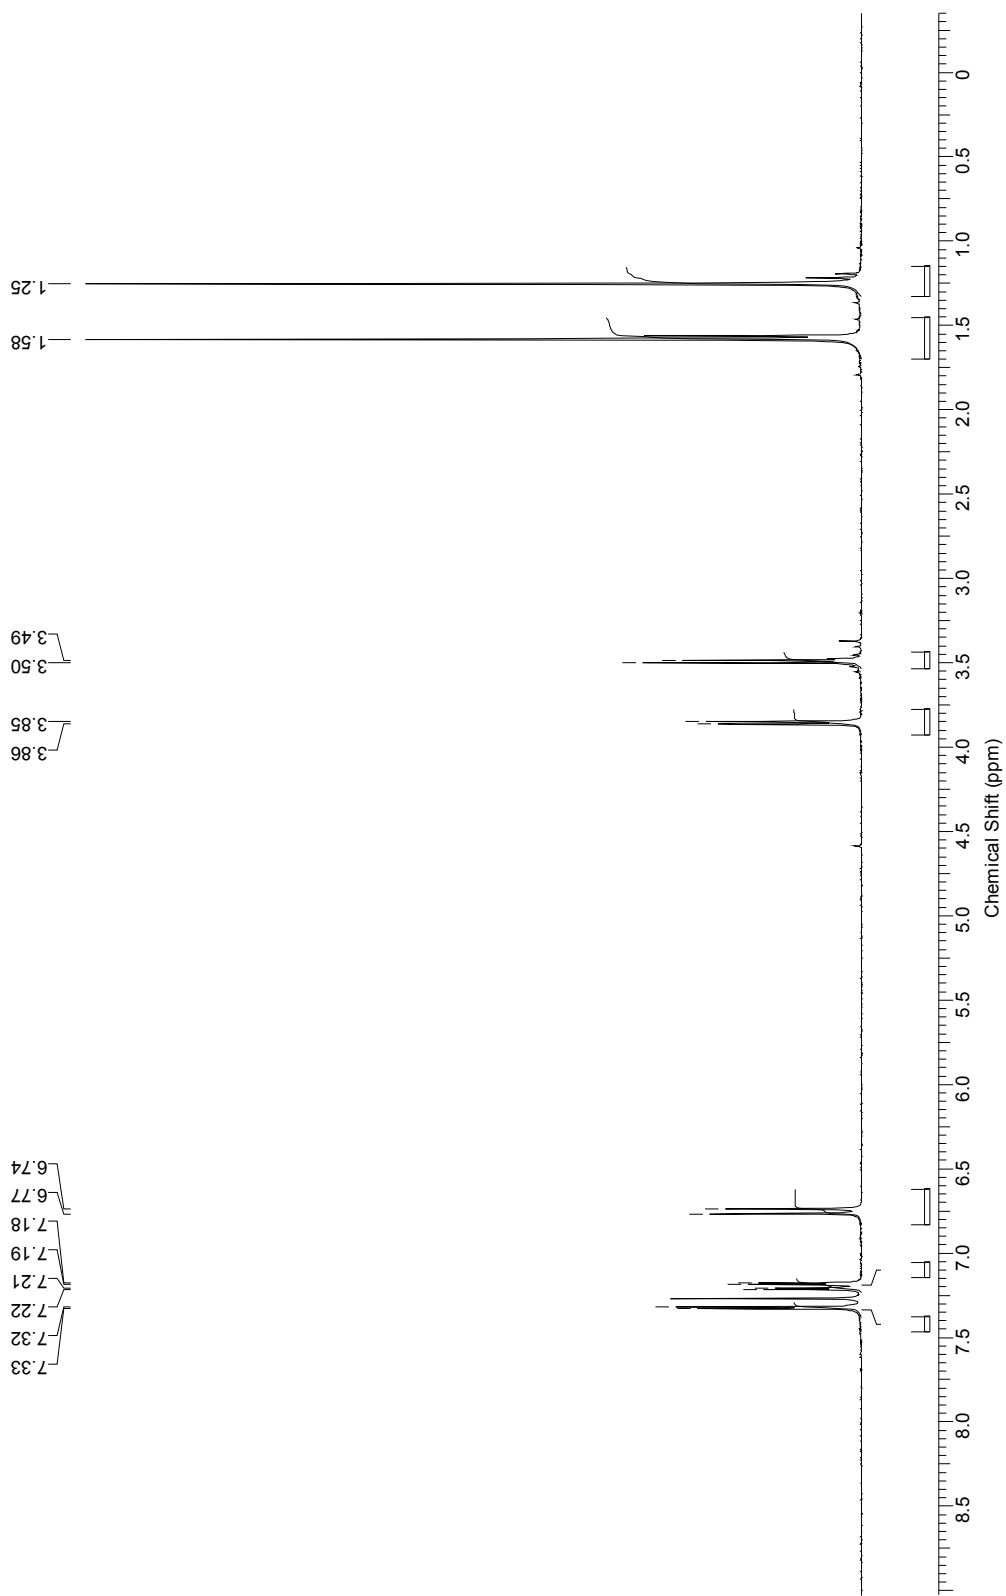

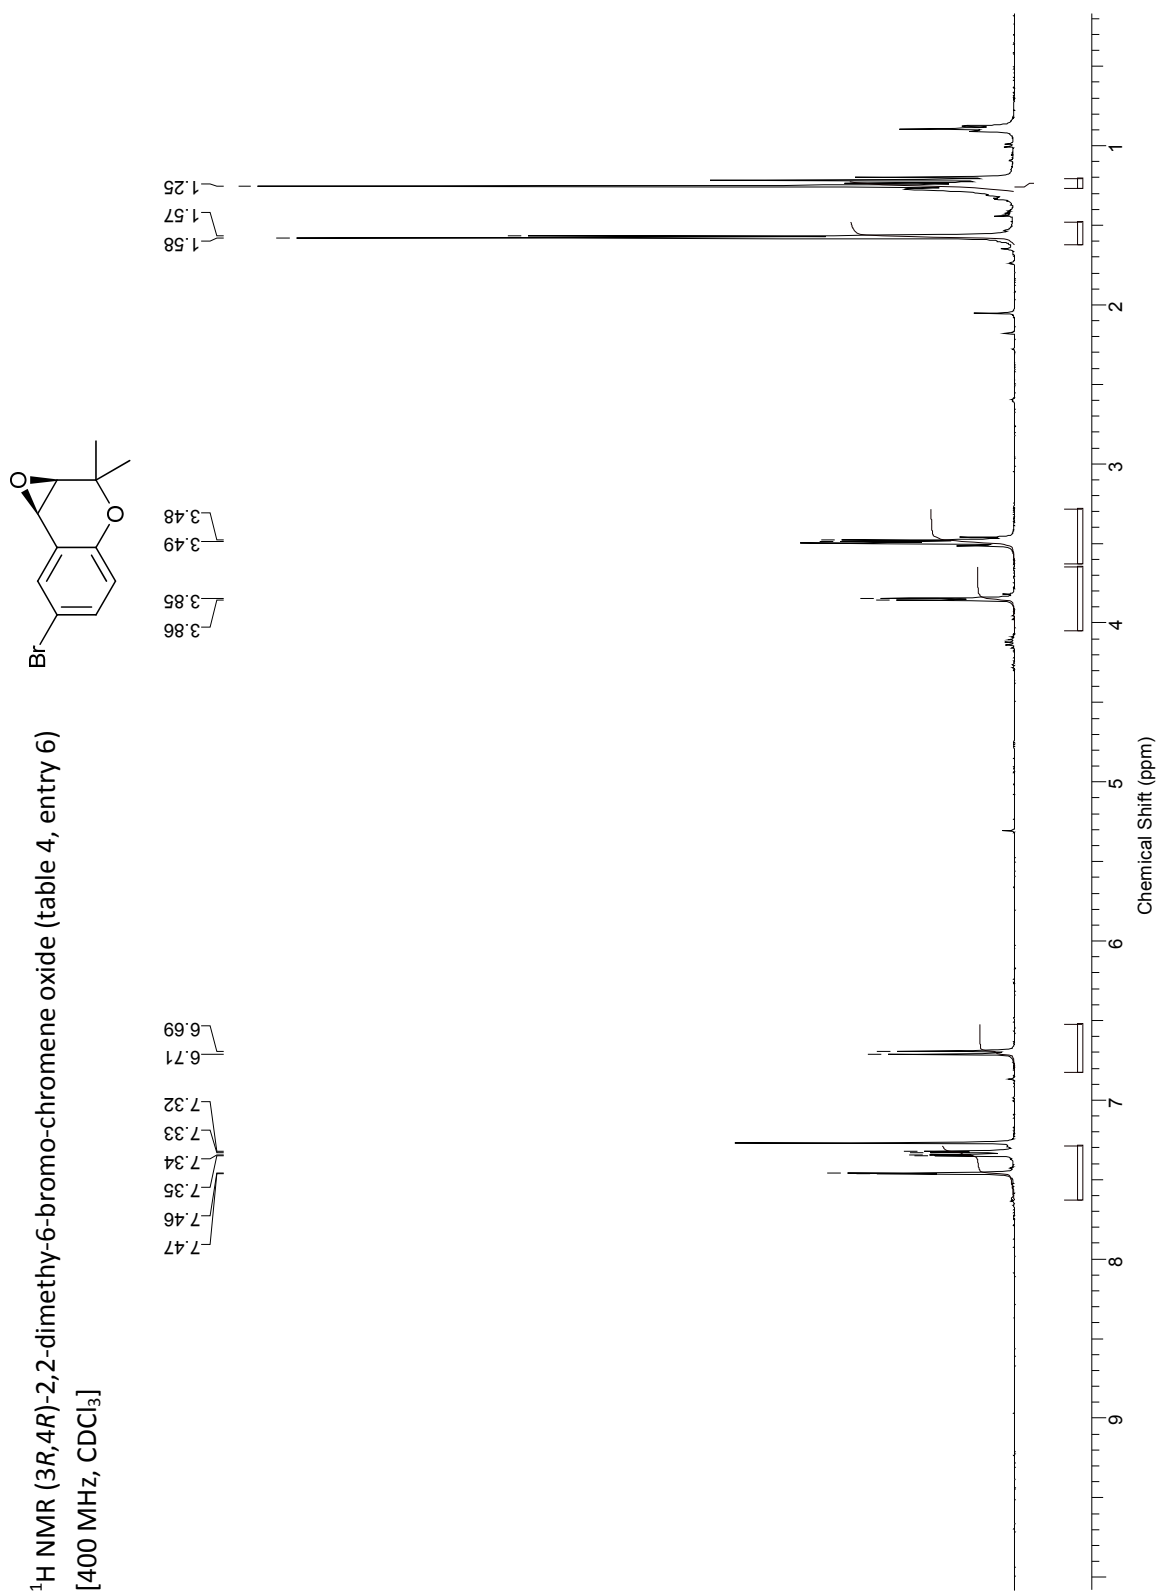



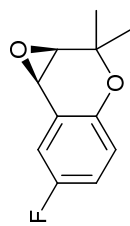

$^1\text{H}$  NMR ( $3R,4R$ )-2,2-dimethyl-6-fluoro-chromene oxide (table 4, entry 7)  
[400 MHz,  $\text{CDCl}_3$ ]

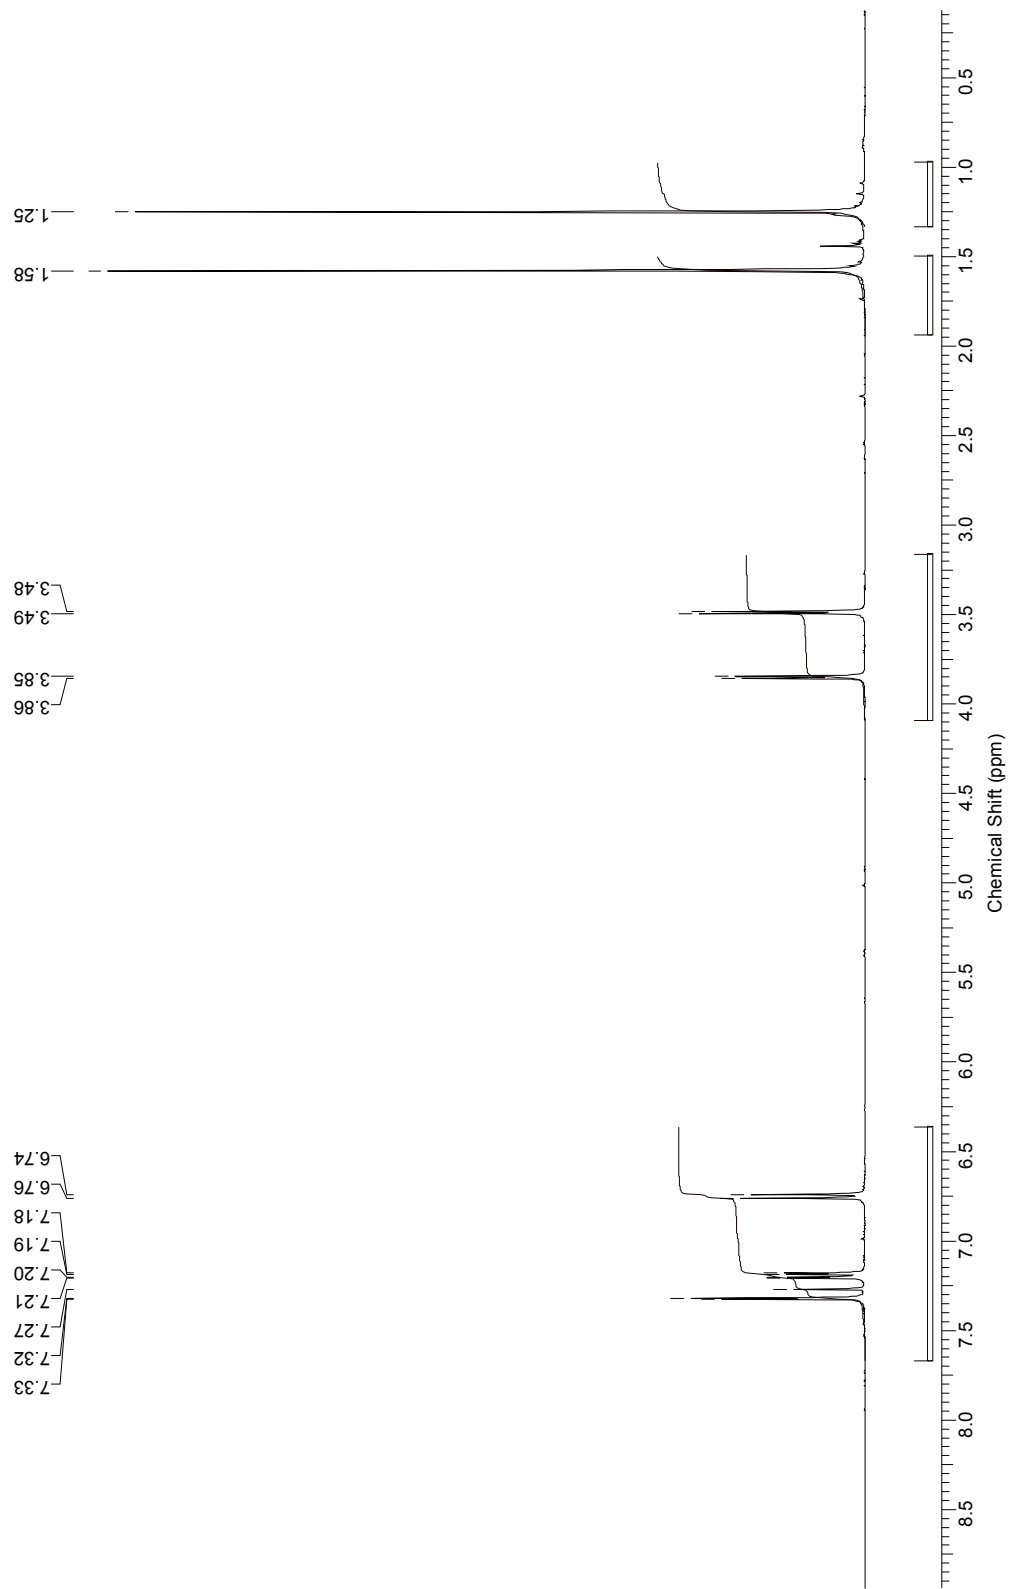

<sup>1</sup>H NMR (1*R*,2*S*)-indene oxide (table 4, entry 4)  
[300 MHz, CDCl<sub>3</sub>]

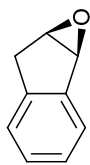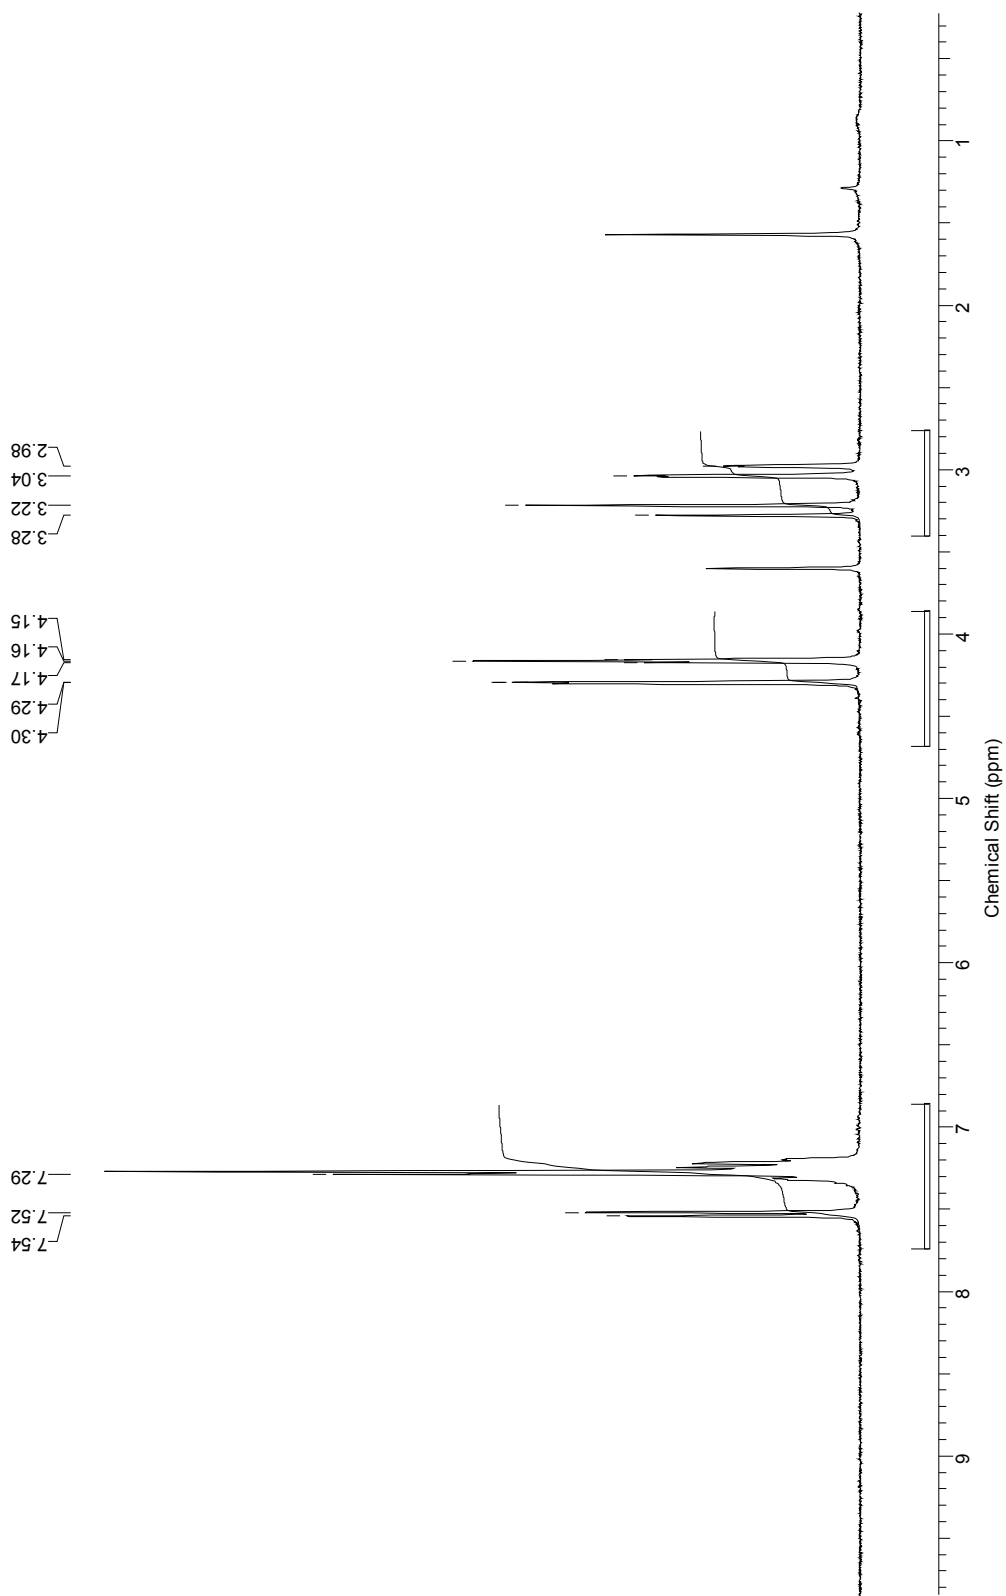

<sup>1</sup>H NMR 1-Phenylcyclohexene oxide (Table 4, entry 5)  
[300 MHz, CDCl<sub>3</sub>]

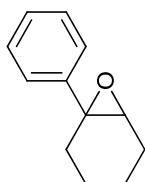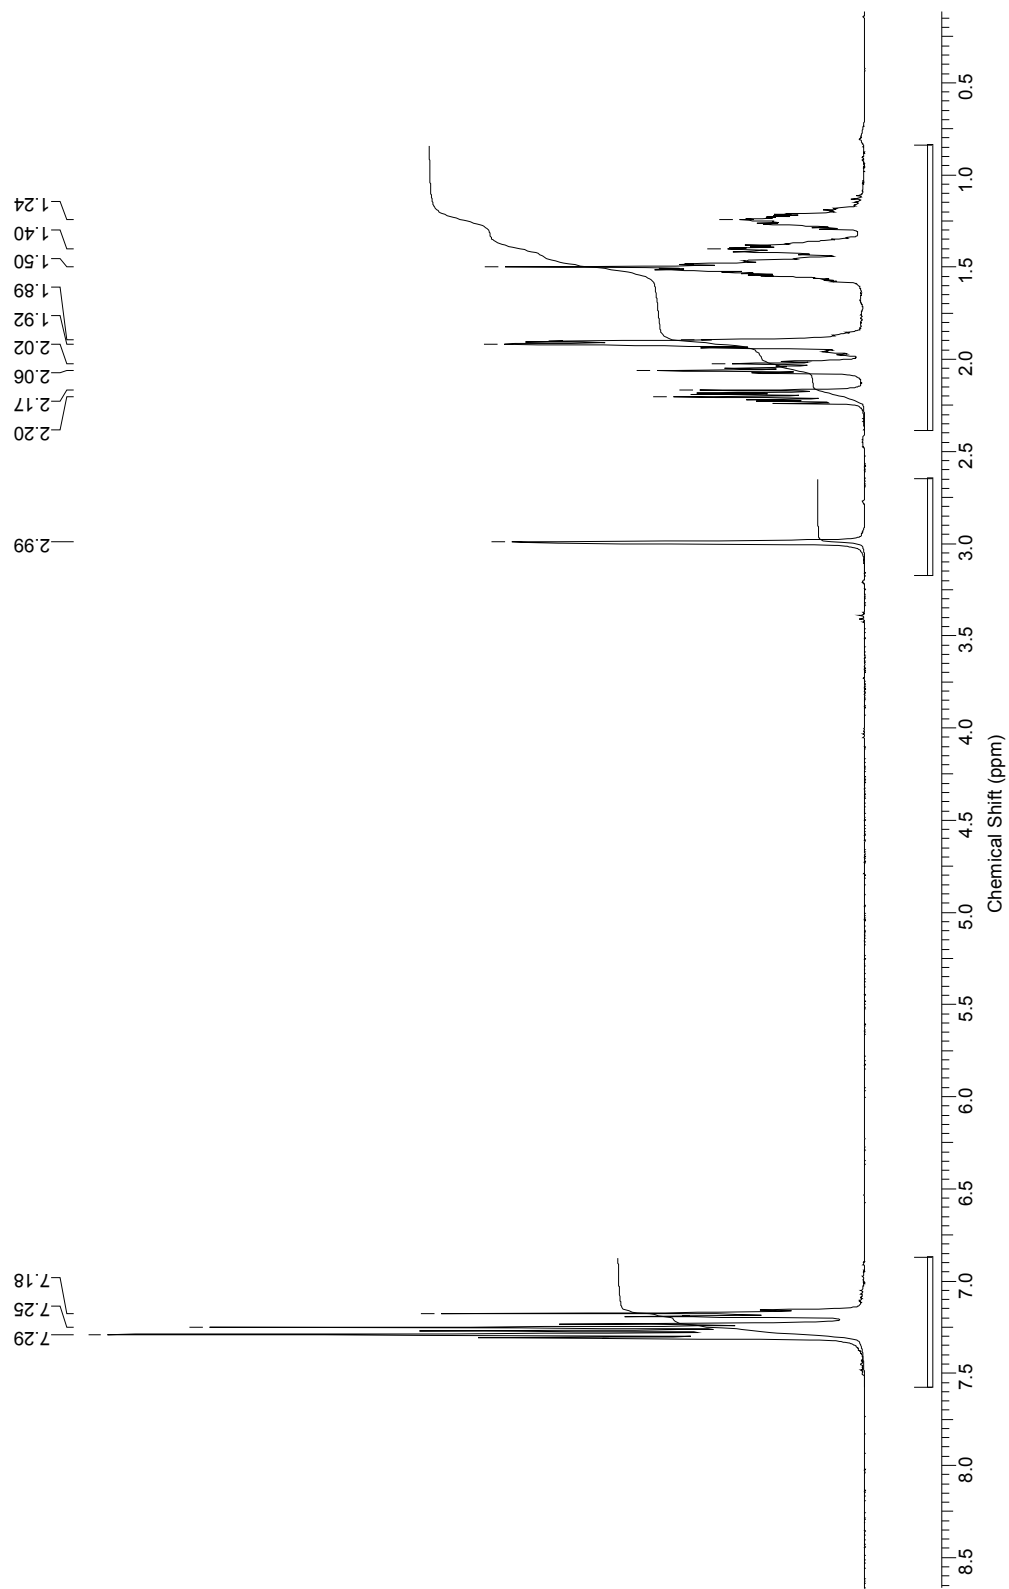

## Chiral HPLC chromatograms for epoxides

### HPLC chromatogram of (1*S*,2*R*)-1,2-dihydronaphthalene oxide (table 4, entry 1)

[Column: Chiralcel OBH column; Eluent: 1 % IPA / hexanes; Flowrate: 1.0 mL min<sup>-1</sup>; Detection: UV254nm] (e.e. 90 %)

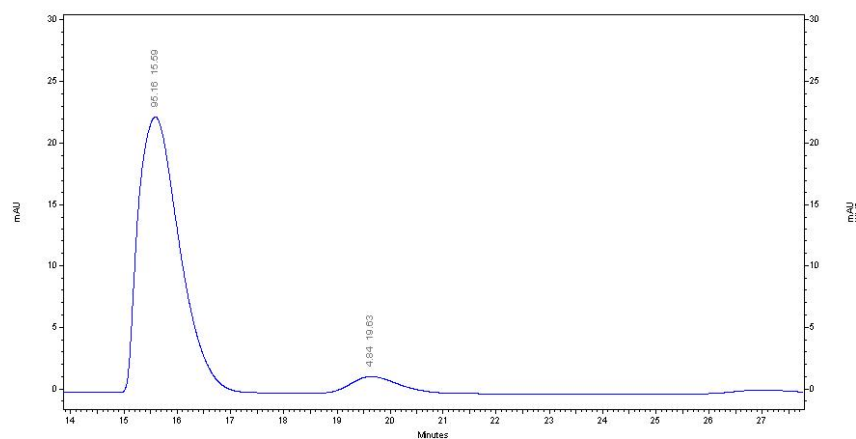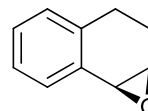

### HPLC chromatogram of (*R,R*)-*trans*-stilbene oxide (table 4, entry 2)

[Column: Chiralcel ODH column; Eluent: 2 % IPA / hexanes; Flowrate: 1.0 mL min<sup>-1</sup>; Detection: UV254nm] (e.e. 86 %)

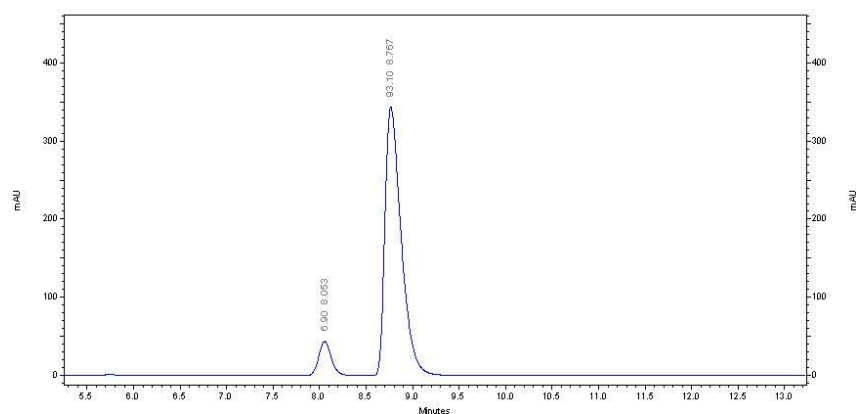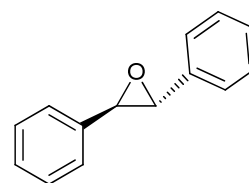

### HPLC chromatogram of (3*R*,4*R*)-2,2-dimethyl-6-cyano-chromene oxide (table 4, entry 3)

[Column: Chiralcel ODH column; Eluent: 10 % IPA / hexanes; Flowrate: 1.0 mL min<sup>-1</sup>; Detection: UV220nm] (e.e. 88 %)

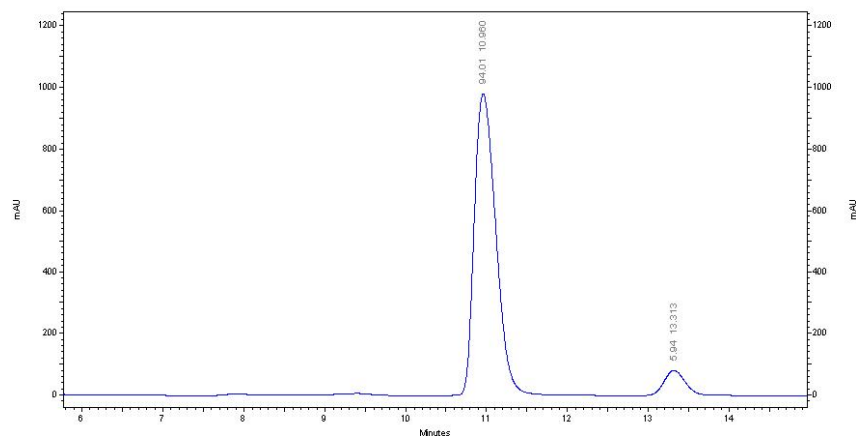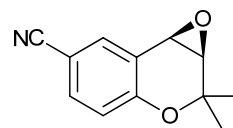

### HPLC chromatogram of (3*R*,4*R*)-2,2-dimethylchromene oxide (table 4, entry 4)

[Column: Chiralcel ODH column; Eluent: 10 % IPA / hexanes; Flowrate: 1.0 mL min<sup>-1</sup>; Detection: UV220nm] (e.e. 80 %)

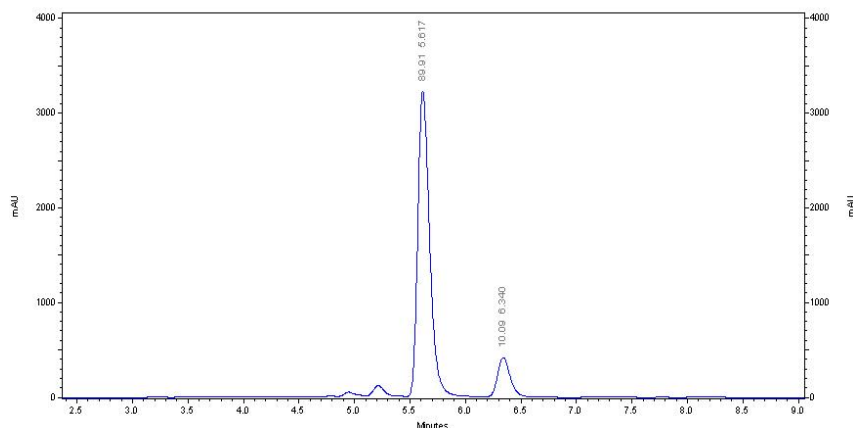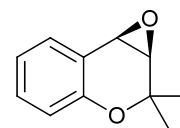

### HPLC chromatogram of (3*R*,4*R*)-2,2-dimethyl-6-chloro-chromene oxide (table 4, entry 5)

[Column: Chiralcel ODH column; Eluent: 10 % IPA / hexanes; Flowrate: 1.0 mL min<sup>-1</sup>; Detection: UV220nm] (e.e. 79 %)

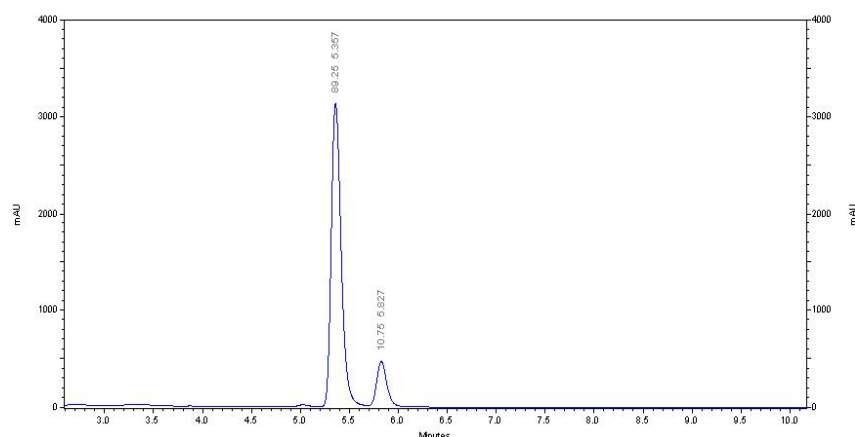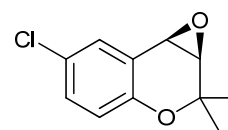

### HPLC chromatogram of (3*R*,4*R*)-2,2-dimethyl-6-bromo-chromene oxide (table 4, entry 6)

[Column: Chiralcel ODH column; Eluent: 10 % IPA / hexanes; Flowrate: 1.0 mL min<sup>-1</sup>; Detection: UV220nm] (e.e. 83 %)

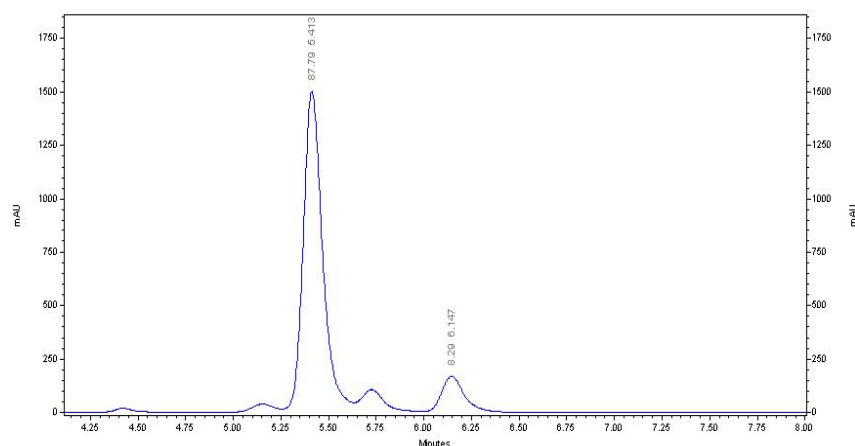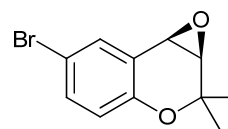

### HPLC chromatogram of (3*R*,4*R*)-2,2-dimethyl-6-fluoro-chromene oxide (table 4, entry 7)

[Column: Chiralcel ODH column; Eluent: 10 % IPA / hexanes; Flowrate: 1.0 mL min<sup>-1</sup>; Detection: UV220nm] (e.e. 81 %)

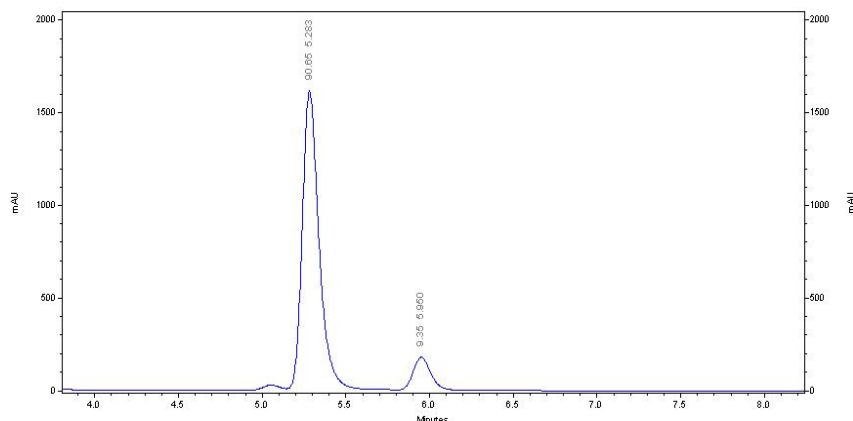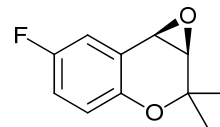

### HPLC chromatogram of (1*R*,2*S*)-indene oxide (table 4, entry 8)

[Column: Chiralcel OB column; Eluent: 0.5 % IPA / hexanes; Flowrate: 1.0 mL min<sup>-1</sup>; Detection: UV220nm] (e.e. 68 %)

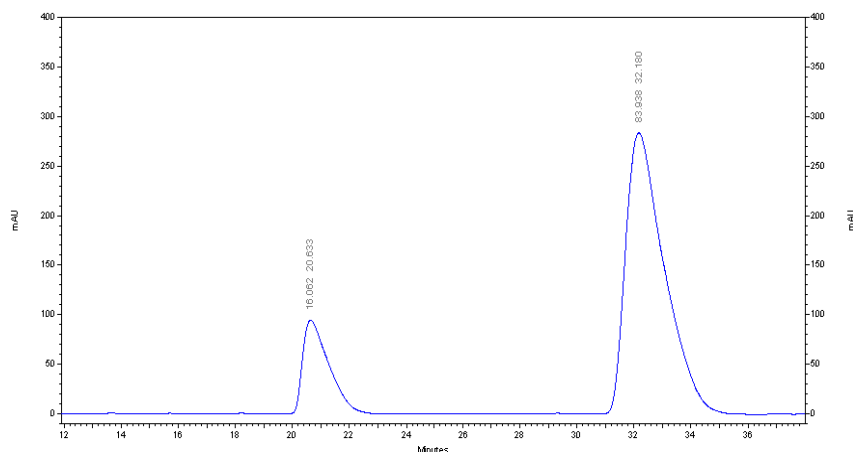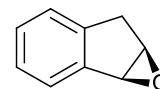

### HPLC chromatogram of phenylcyclohexene oxide (table 4, entry 9)

[Column: Chiralcel ODH column; Eluent: 1 % IPA / hexanes; Flowrate: 0.5 mL min<sup>-1</sup>; Detection: UV220nm] (e.e. 18 %)

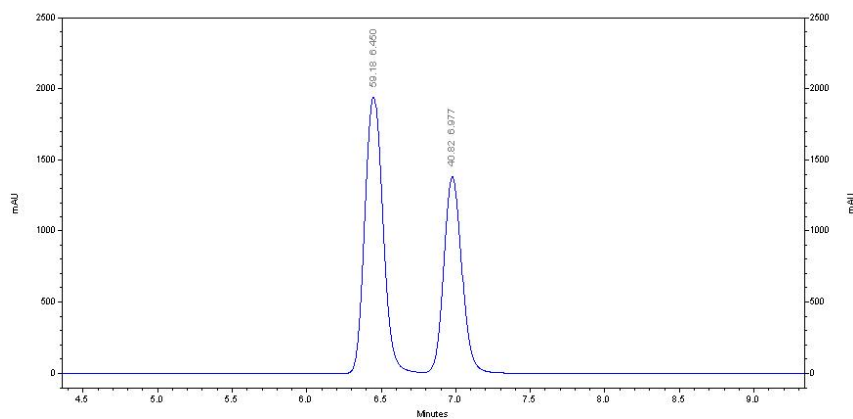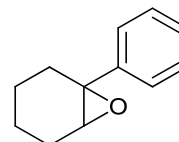

Supplement: c2ra21837b.pdf [file c2ra21837b.pdf]
